# Supplementary material for: Multiscale 3D genome reorganization during skeletal muscle stem cell lineage progression and aging
Source: PubMed Central journal article supplement — Sci Adv. 2023 Feb 17;9(7):eabo1360. doi: 10.1126/sciadv.abo1360 (PMC9937580; doi:10.1126/sciadv.abo1360), 2023-02-17
Supplement: sciadv.abo1360_sm.pdf [file sciadv.abo1360_sm.pdf]

Supplementary Materials for  
**Multiscale 3D genome reorganization during skeletal muscle stem cell lineage  
progression and aging**

Yu Zhao *et al.*

Corresponding author: Yu Zhao, zhaoyu25@mail.sysu.edu.cn; Hao Sun, haosun@cuhk.edu.hk;  
Huating Wang, huating.wang@cuhk.edu.hk

*Sci. Adv.* **9**, eabo1360 (2023)  
DOI: 10.1126/sciadv.abo1360

**The PDF file includes:**

Figs. S1 to S15  
Legends for tables S1 to S12

**Other Supplementary Material for this manuscript includes the following:**

Tables S1 to S12

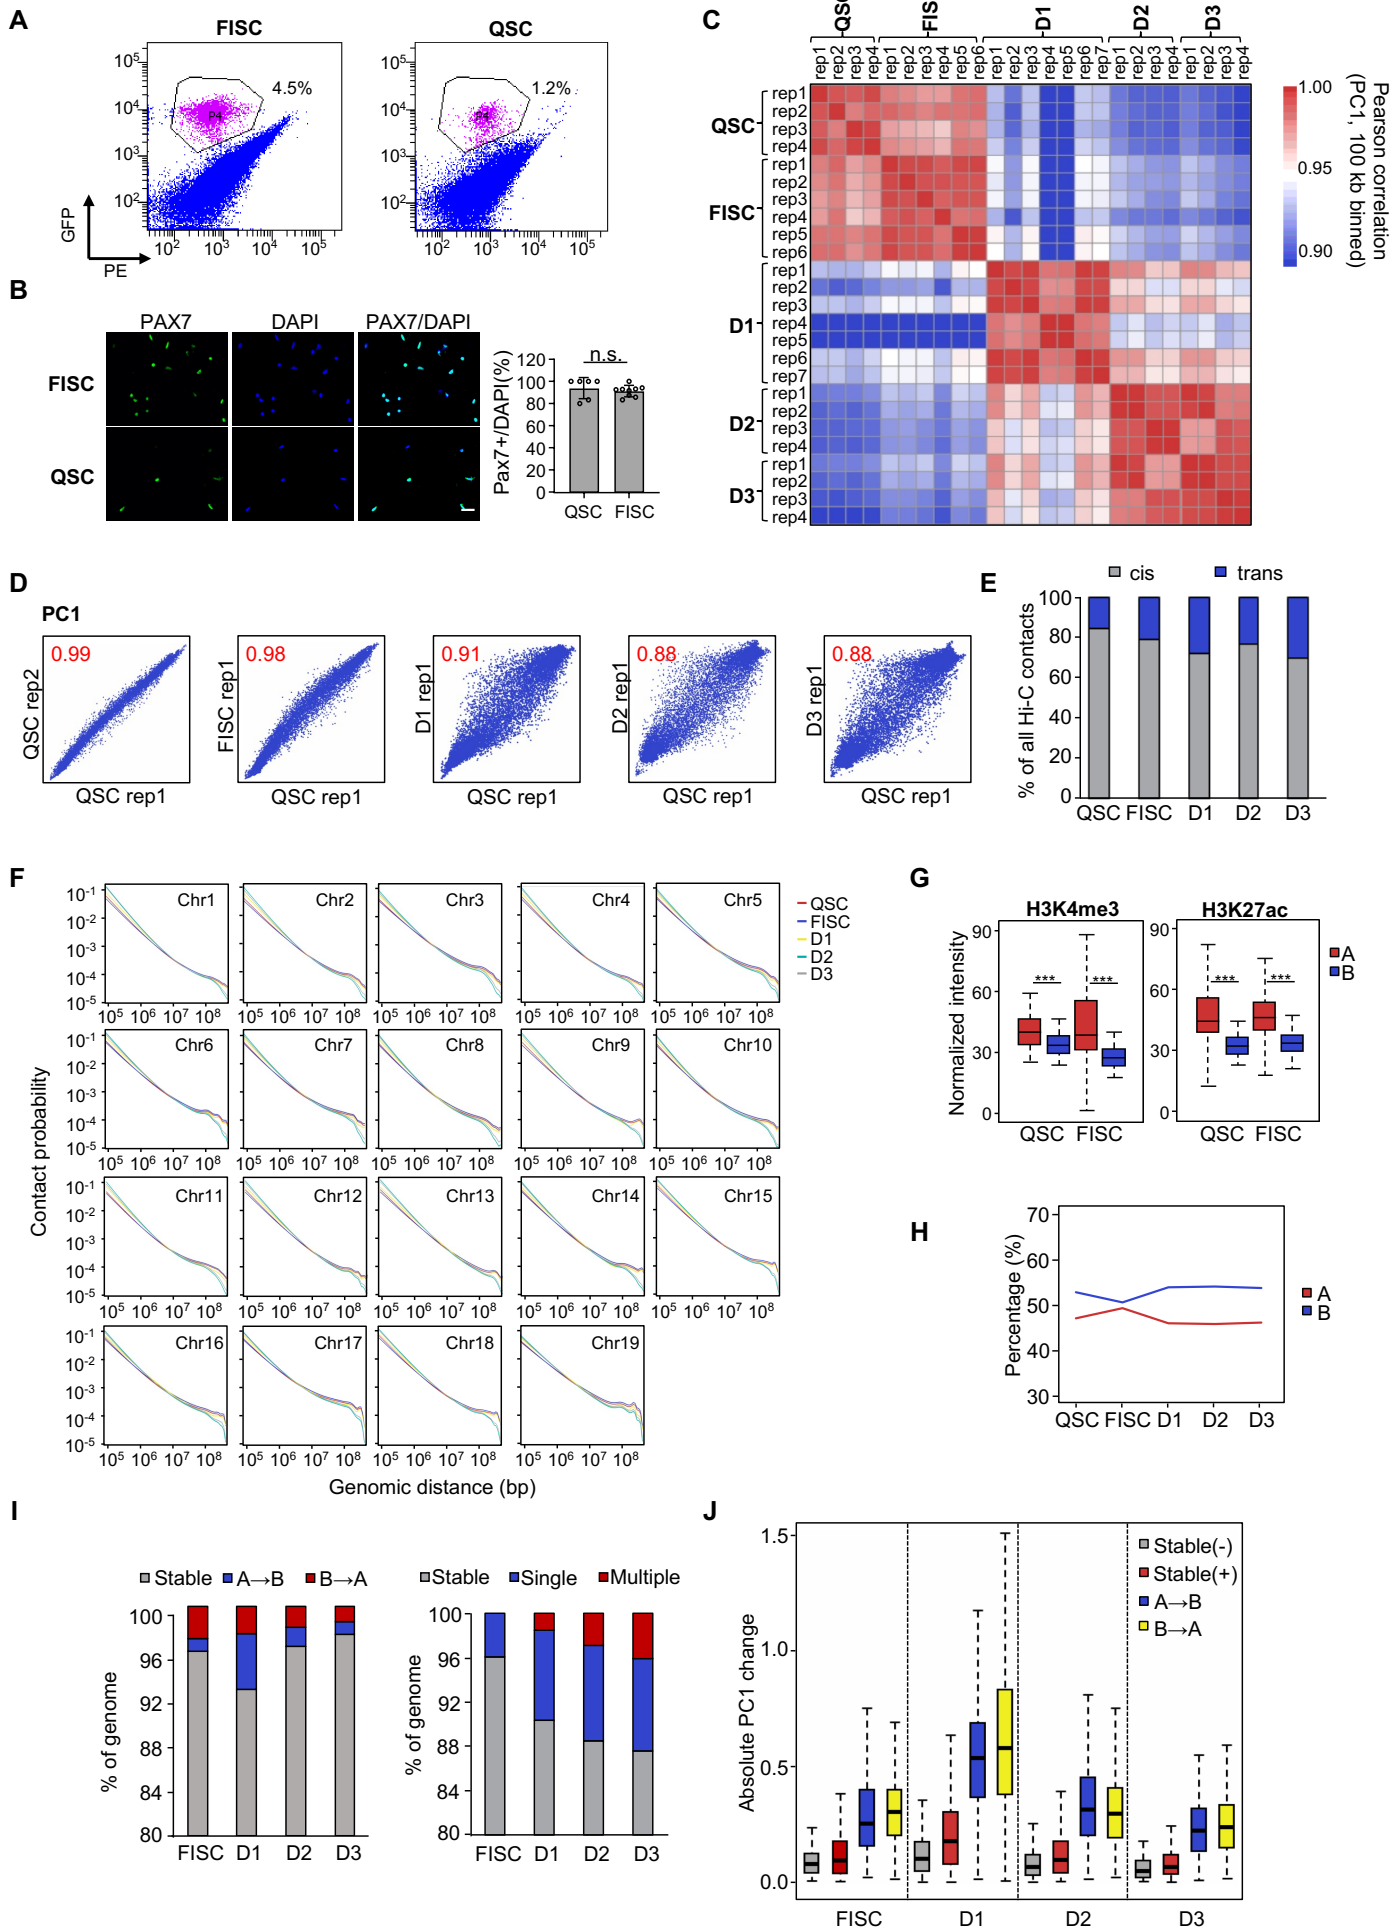

**Figure S1. Global reorganization of genome compartmentalization during SC lineage development.** (A) GFP+ FISCs or QSCs were collected from *Pax7-nGFP* muscle by FACS sorting. FACS profiles are shown. GFP+ cells are marked as magenta dots. Values on the plots indicate mean percentage of sorted GFP+ cells in the total number of events. (B) Immunofluorescence staining for PAX7 was performed on the above collected QSC and FISC. The percentage of PAX7+ cells is shown on the right. Scale bar, 10  $\mu$ m.  $n = 6-9$  fields. (C) *In situ* Hi-C was performed on QSC, FISC, ASC-D1, ASC-D2, or DSC-D3. Heat map showing the Pearson correlation among all replicates of Hi-C samples, based on the PC1 values (100 kb bins). (D) Scatter plots of PC1 values showing change of each time point relative to QSC replicate 1. Pearson correlation coefficients are indicated. (E) The percentage of *cis* and *trans* chromosomal Hi-C contacts in the Hi-C datasets at each time point. (F) Contact probability relative to genomic distance of individual chromosomes. (G) Enrichment of H3K4me3 and H3K27Ac ChIP-seq signals in A or B compartments in QSC and FISC. \*\*\* $P < 0.0001$ , Wilcoxon signed-rank test. (H) Line chart depicting fraction of the genome assigned to A or B compartments at each time point. (I) Left, bar graph depicting fraction of the genome that switched compartment between any two time points. Right, bar graph depicting switching percentage per time point. (J) Absolute PC1 change between any two time points for regions that switched compartment (A  $\rightarrow$  B or B  $\rightarrow$  A) or did not switch ('stable') but increased (+) or decreased (-) in PC1 value.

**A**

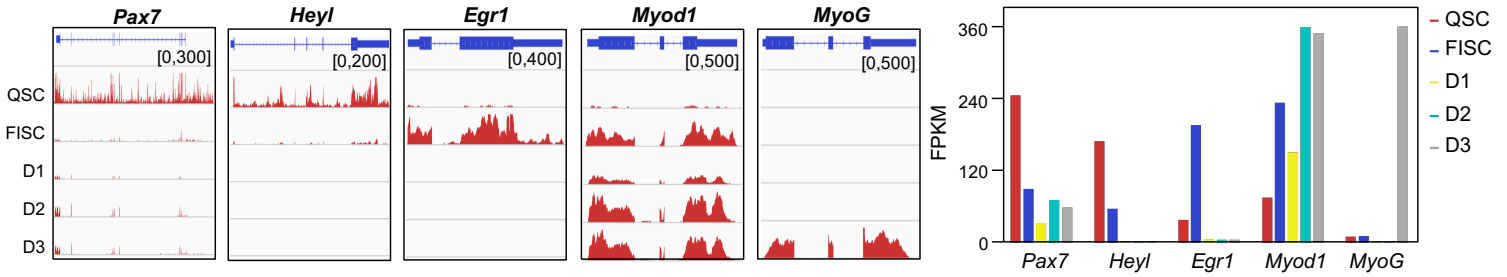

**B**

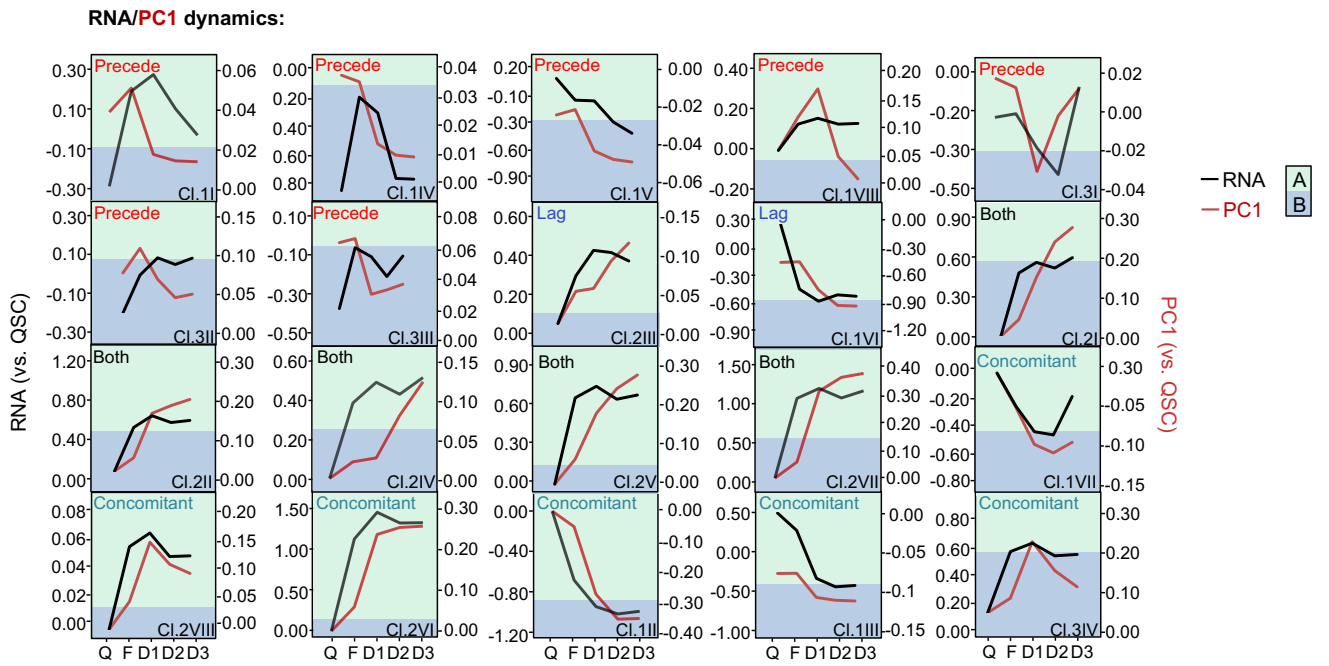

**C**

|                 | Cluster | Gene no. | Class       | GO term                                                              | Cluster | Gene no. | Class       | GO term                                             |
|-----------------|---------|----------|-------------|----------------------------------------------------------------------|---------|----------|-------------|-----------------------------------------------------|
| B-to-A switch   | 1I      | 249      | Preceding   | negative regulation of DNA demethylation                             | 2I      | 91       | Both        | cell migration                                      |
|                 | 1III    | 137      | Concomitant | negative regulation of complement activation                         | 2II     | 125      | Both        | DNA binding                                         |
|                 | 1III    | 199      | Concomitant | nucleic acid binding                                                 | 2III    | 168      | Lag         | regulation of the apoptotic process                 |
|                 | 1IV     | 282      | Preceding   | transcription factor complex                                         | 2IV     | 151      | Both        | positive regulation of transcription, DNA-templated |
|                 | 1V      | 295      | Preceding   | transcription coactivator activity                                   | 2V      | 202      | Both        | cell development                                    |
|                 | 1VI     | 201      | Lagging     | cell division & cell cycle                                           | 2VI     | 147      | Concomitant | extracellular exosome                               |
|                 | 1VII    | 98       | Concomitant | positive regulation of fibroblast proliferation                      | 2VII    | 82       | Both        | protein processing                                  |
|                 | 1VIII   | 103      | Preceding   | nucleic acid binding, cell junction                                  | 2VIII   | 103      | Concomitant | protein auto phosphorylation                        |
| Multiple switch | 3I      | 193      | Preceding   | positive regulation of transcription from RNA polymerase II promoter |         |          |             |                                                     |
|                 | 3II     | 209      | Preceding   | myofibril                                                            |         |          |             |                                                     |
|                 | 3III    | 208      | Preceding   | cell differentiation                                                 |         |          |             |                                                     |
|                 | 3IV     | 117      | Concomitant | cell junction, cell communication                                    |         |          |             |                                                     |

**Figure S2. Integrated kinetics of transcriptome and compartmentalization during SC lineage development.** (A) left: Genome browser view of *Pax7*, *Heyl*, *Egr1*, *Myod1* and *MyoG* gene expression measured by RNA-seq data; right: bar graph depicting the RPKM values of the above genes across the SC lineage progression. (B) 20 types of switching clusters were identified and the dynamics of average RNA expression versus PC1 are shown. (C) Summarized gene ontology (GO) annotation of the 20 clusters grouped by switching dynamics during SC lineage progression.

**A**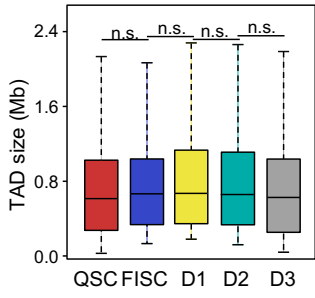**B**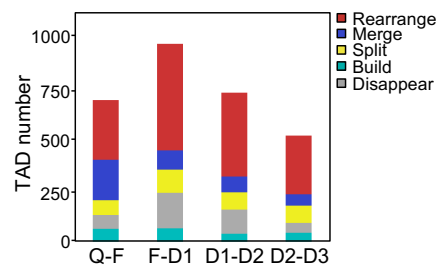**C**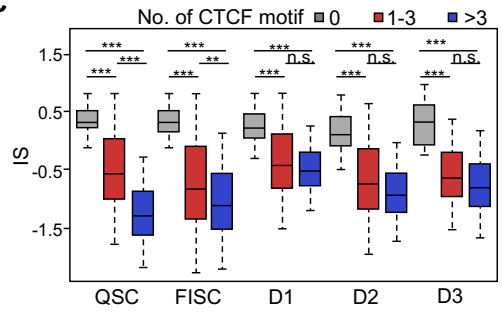**D**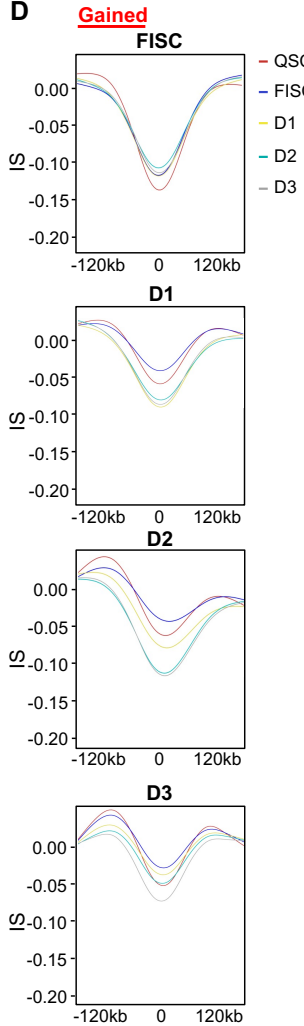**D2 gained border**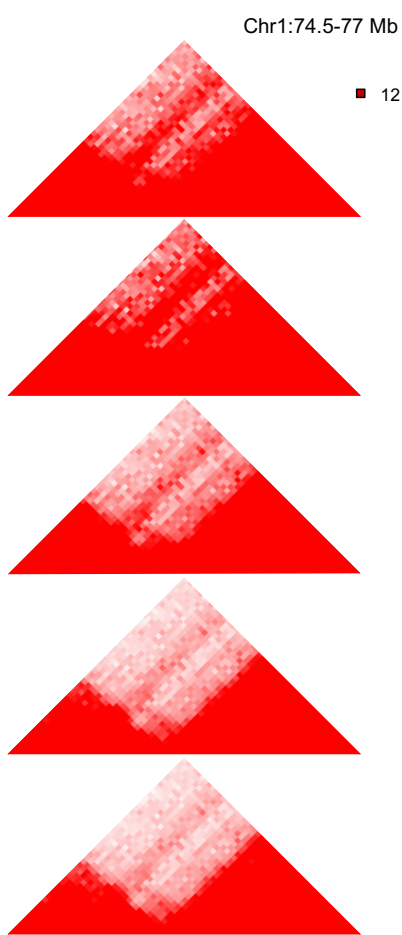**E**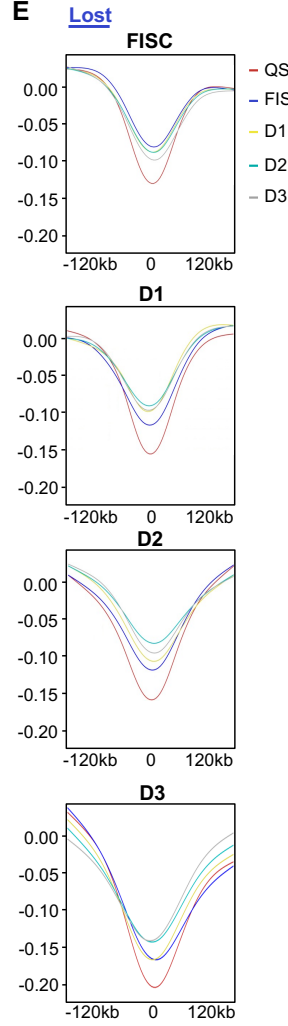**D2 lost border**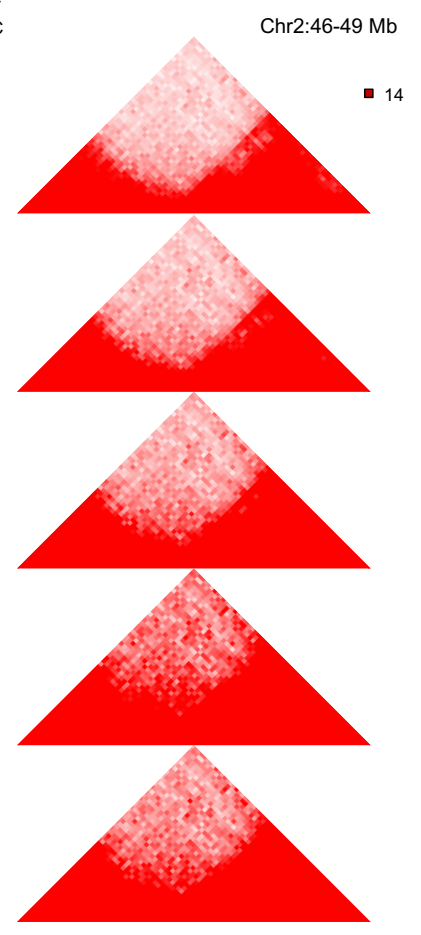**F**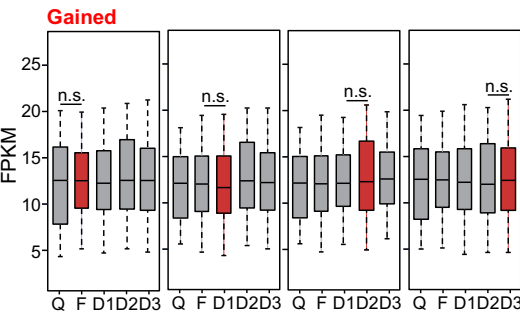**G**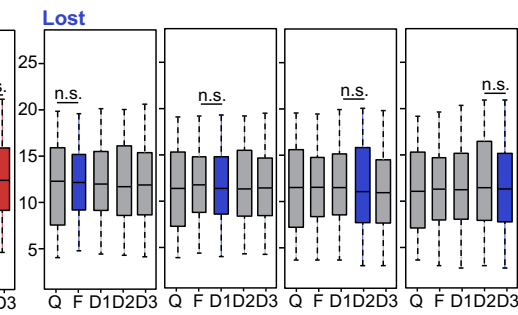**H**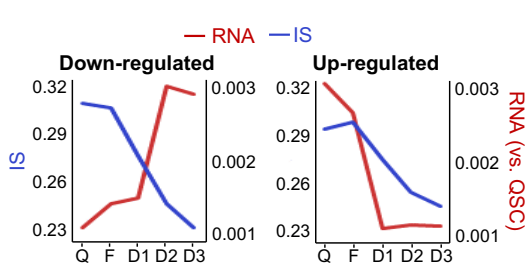**I**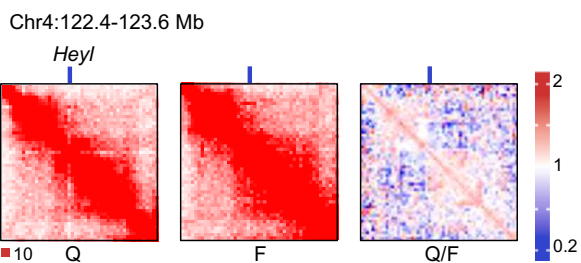**J**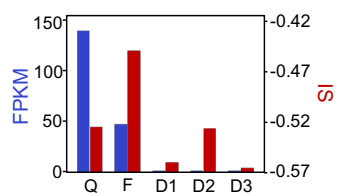

**Figure S3. Dynamic TAD boundary organization during SC lineage development.** (A) Boxplots showing TAD size distribution at each stage. (B) Bar graph showing the number of TADs that were rearranged, merged, split, built or disappeared between two adjacent stages. (C) Boxplots showing IS of TAD borders harboring 0, 1-3 or >3 CTCF motifs. (D-E) Average IS in a 240 kb region centered on TAD boundaries gained or lost over time during SC lineage progression. Lines show mean values (left). Representative *in situ* Hi-C contact maps of a novel boundary gained at D2 (D, right) or lost at D2 (E, right). (F-G) Boxplots depicting gene expression (RPKM) dynamics for border regions that were gained (red) or lost (blue) during SC development. (H) Kinetics of mean expression level (FPKM) changes at dynamic borders harboring genes that were either up-regulated or down-regulated after IS decreased. (I) Illustration of *in situ* Hi-C contact maps (40-kb resolution) on the *Heyl* locus. (J) Bar graph showing IS and FPKM kinetics of *Heyl* residing TAD border. Data in A, C, F, and G are presented in boxplots. \*\* $P < 0.001$ , \*\*\* $P < 0.0001$ , n.s., no significance, Wilcoxon signed-rank test.

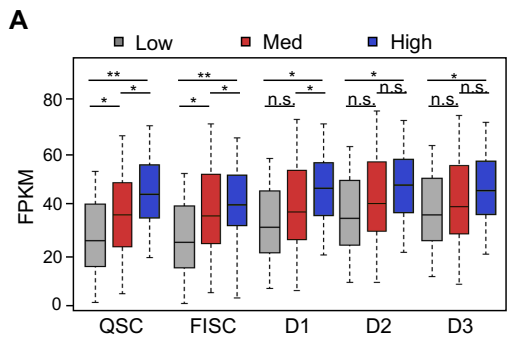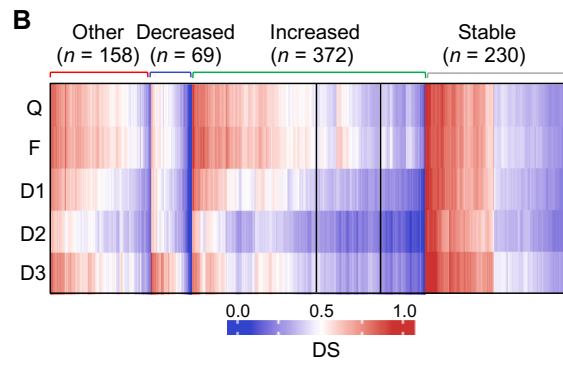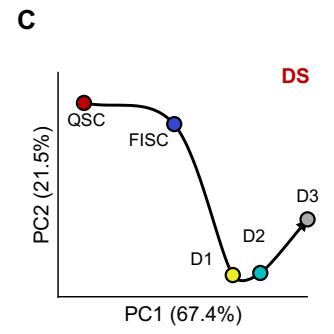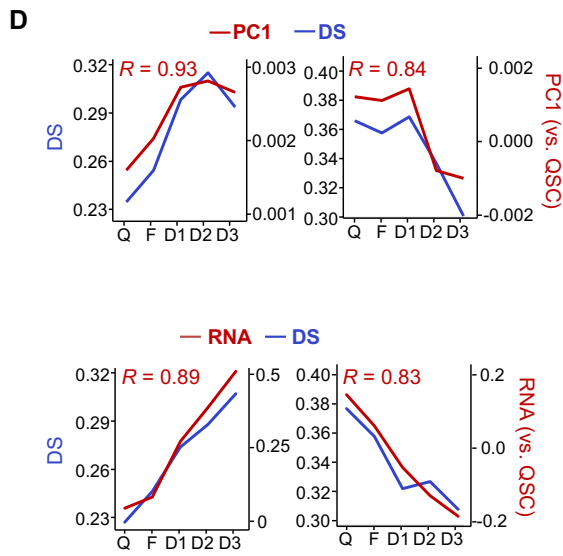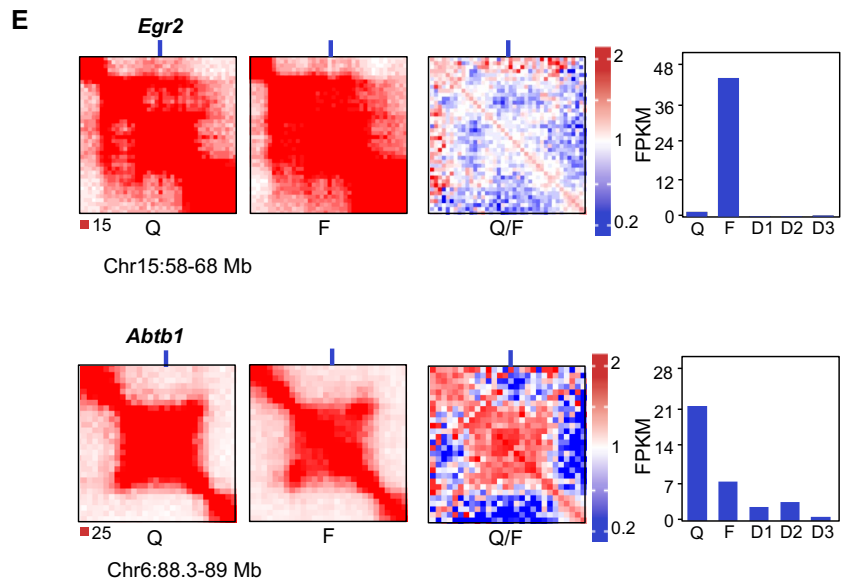



**Figure S4. Intra-TAD interactions are rewired during SC lineage development. (A)** Boxplots depicting average expression of genes (FPKM) in TADs with a low (0, 0.3), med (0.3,0.6) or high (0.6, 1) D-score at each stage. \* $P < 0.01$ , \*\* $P < 0.001$ , n.s., no significance, Wilcoxon signed-rank test. **(B)**  $k$ -means clustering ( $k = 20$ ) of D scores. **(C)** PCA of D-score during SC lineage progression. Hypothetical trajectory is shown as black arrow. **(D)** Average D-score and PC1 kinetics (top) or gene expression (bottom) analysis for clusters of TADs that were gained ( $n = 2,172$ , left) or lost ( $n = 467$ , right) in D3 vs QSC. Pearson correlation coefficients ( $R$ ) are indicated. **(E)** Illustration of *in situ* Hi-C contact maps (40-kb resolution) on the *Egr2* locus on Chr15 (top) and on the *Abtb1* locus on Chr6 (bottom). The bar graphs show the FPKM kinetics of *Egr2* and *Abtb1* expression.

**A**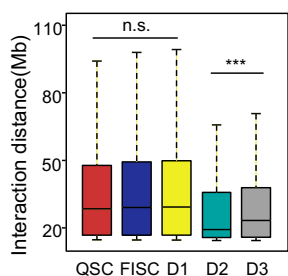**B**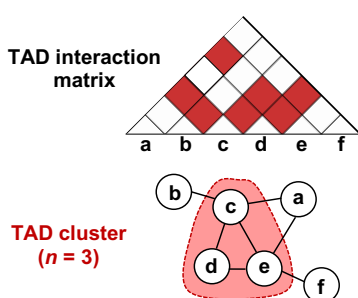**C**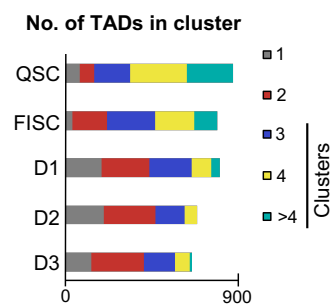**D**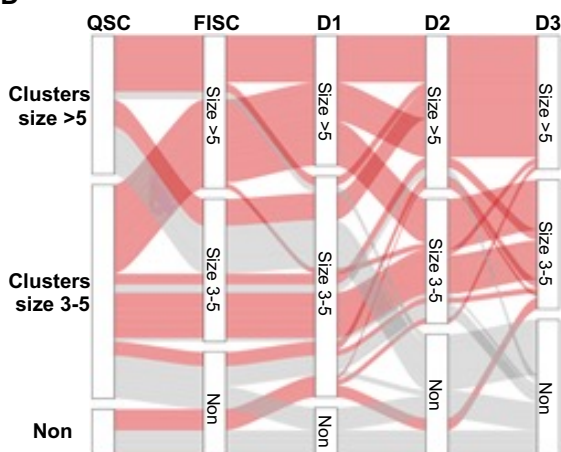**E**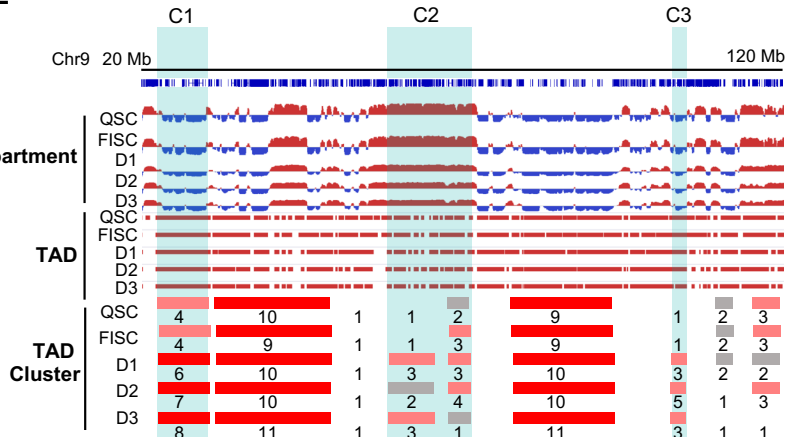**F**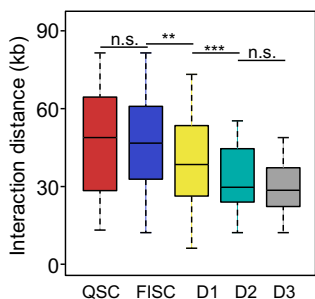**G**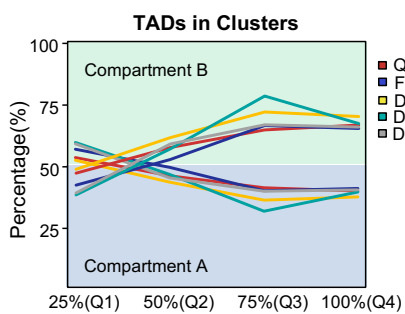**H**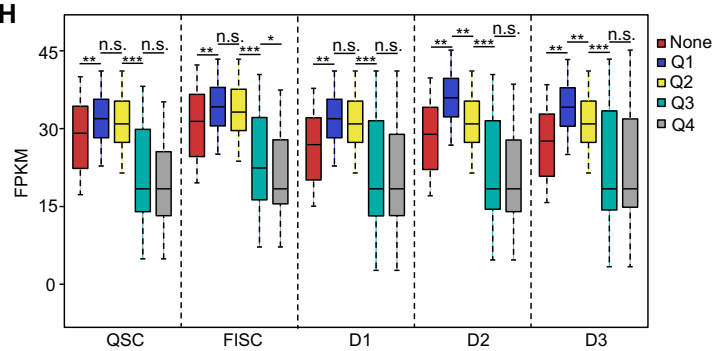**I**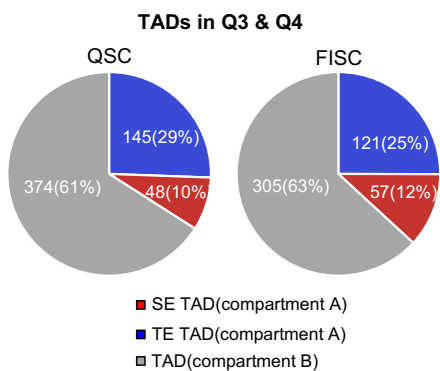**J**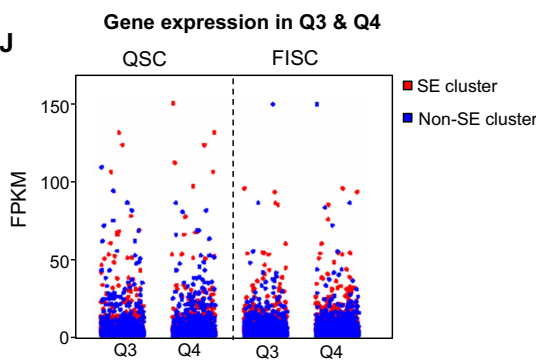**K**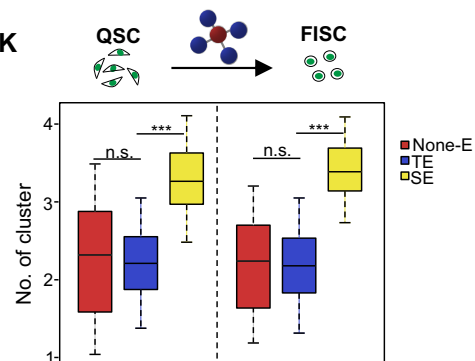**L**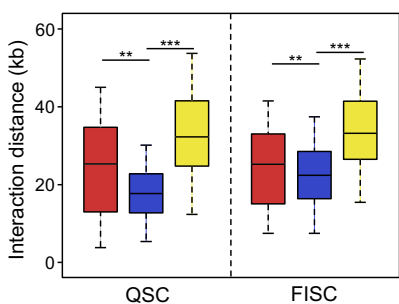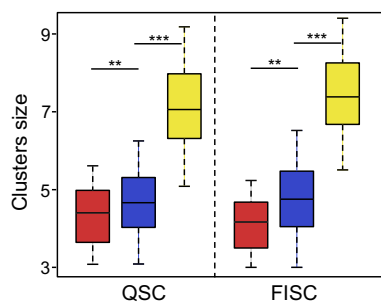**M**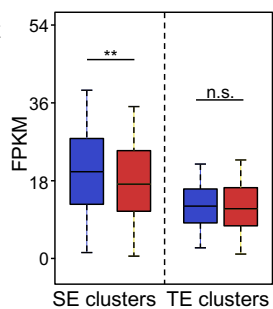**N**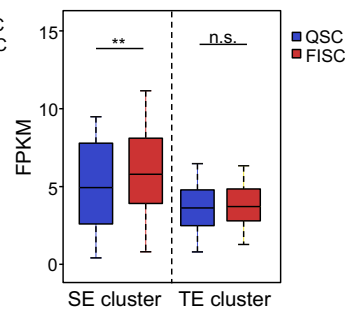

**Figure S5. TAD clusters are dynamically reorganized in FISC vs. QSC.** (A) Boxplots showing the average distance between pair-wise TAD interactions at each time point. (B) (top) illustration of significant interactions between TADs in a matrix (red pixels). (bottom) A TAD cluster (pink) is identified when  $\geq 3$  TADs are fully connected with each other. Edges indicating interaction between two TADs while nodes indicating TADs. (C) Bar charts depicting the number of TADs in clusters as a function of cluster size at each time point. (D) TAD clusters were defined during SC development. Alluvial representation plot showing the formation, loss, expansion and reduction of TAD clusters. Line thickness is proportional to the number of TADs within the clusters on D3 (line color: red, size  $>5$  or 3-5; gray, non-clusters). (E) Genome-browser view of compartment, TAD and TAD cluster of a 100 Mb region on chr 9. The number of TADs in each TAD cluster is shown (bottom tracks). Three dynamic TAD clusters are highlighted in blue box. (F) Box plots showing the average distance between pair-wise TAD interactions in TAD clusters at each time point. (G) TADs in clusters were stratified by quartile of distances between pair-wise TAD interactions. Line charts depicting the fraction of TADs in clusters of each quartile in A and B compartments over time of SC development. (H) Gene expression levels outside clusters (Non) and in clusters of each quartile (Q1, Q2, Q3 or Q4) over time of SC development. (I) TADs are classified into four quartiles (Q1, Q2, Q3 and Q4) according to distance between pair-wise interacting TADs. Pie chart showing the distribution of SE/TE containing TADs in Q3 and Q4. (J) Expression of genes residing in pair-wise interacting TADs in Q3 and Q4. Blue, genes in SE containing TAD clusters; Red, genes in TAD clusters without SE. (K) Boxplots showing the relative number of TAD clusters engaging TE, SE or random control regions at QSC or FISC stage. (L) Left, Boxplots showing the average distance between pair-wise TAD interactions that TE or SE engaged in at QSC or FISC stage. Right, Boxplots showing the size of TAD clusters (i.e. the number of TADs within a TAD cluster) engaging TE, SE or random control regions at QSC or FISC stage. (M-N) Boxplots depicting expression dynamics (RPKM) in FISC vs. QSC for TAD clusters with TE or SE engagement at QSC (M) or FISC (N) stage. Data in A, F, H, K, L, M and N are presented in boxplots. \* $P < 0.01$ , \*\* $P < 0.001$ , \*\*\* $P < 0.0001$ . n.s., no significance, Wilcoxon signed-rank test.

A

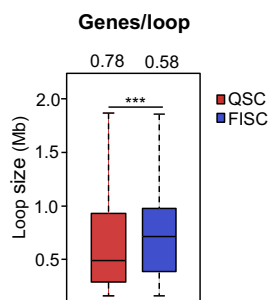

B

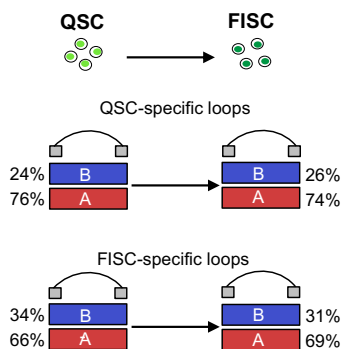

C

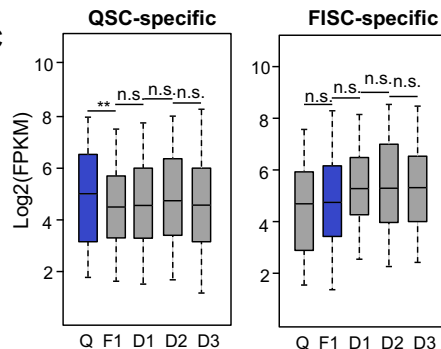

D

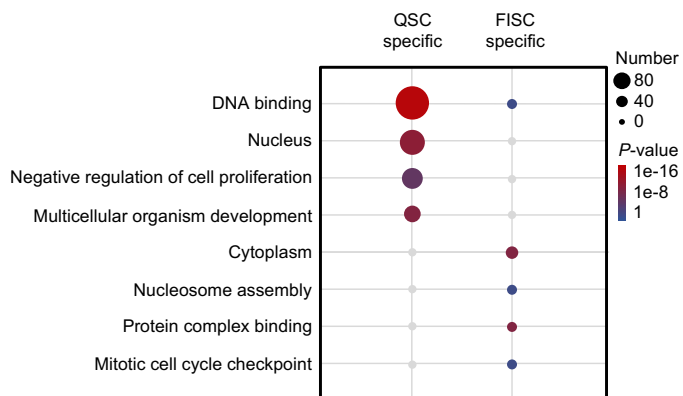

E

HICCUPS (5kb)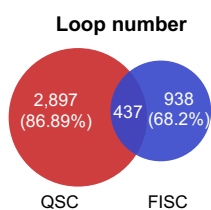

F

HICCUPS (5kb)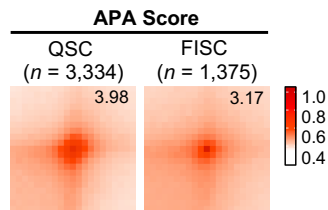

H

Mustache (5kb)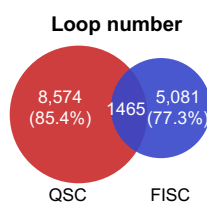

I

Mustache (5kb)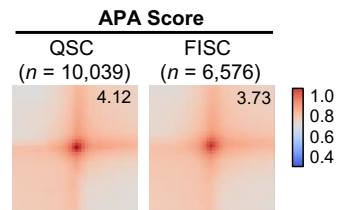

G

HICCUPS (5kb)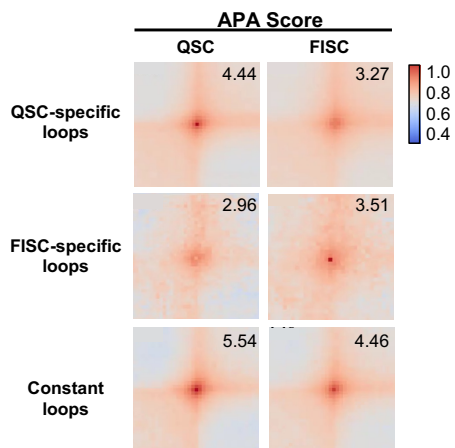

J

Mustache (5kb)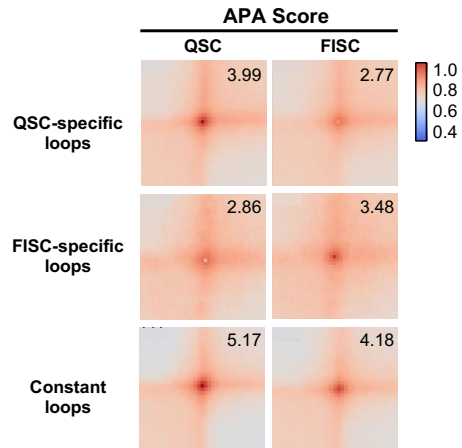

**Figure S6. Chromatin loops are dynamically rewired during SC early activation. (A)** Boxplot depicting loop size in QSC and FISC. Average number of genes per loop in QSC and FISC are shown above. **(B)** Illustration showing the percentage of QSC- or FISC- specific loops within A or B compartments. **(C)** Box plot depicting expression dynamics of genes within QSC- or FISC- specific loops. **(D)** Bubble plot of the enriched GO terms associated with genes in QSC- or FISC- specific loops. The bubble size represents the number of genes enriched in each term; the bubble color represents the enrichment significance. **(E)** Pie chart showing the overlapping between chromatin loops detected in QSC ( $n = 3,334$ ) and FISC ( $n = 1,375$ ) by HICCUPS. **(F)** Aggregated peak analysis (APA) analysis of all chromatin loops detected by HICCUPS at QSC or FISC. Bin size, 5 kb. **(G)** APA analysis of QSC- or FISC- specific loops and constant loops detected by HICCUPS. Bin size, 5 kb. Numbers indicate average loop strength. **(H-J)** The above chromatin loop analyses were conducted by Mustache. Data in A and C are presented in boxplots.  $**P < 0.001$ ,  $***P < 0.0001$ . n.s., no significance, Wilcoxon signed-rank test.

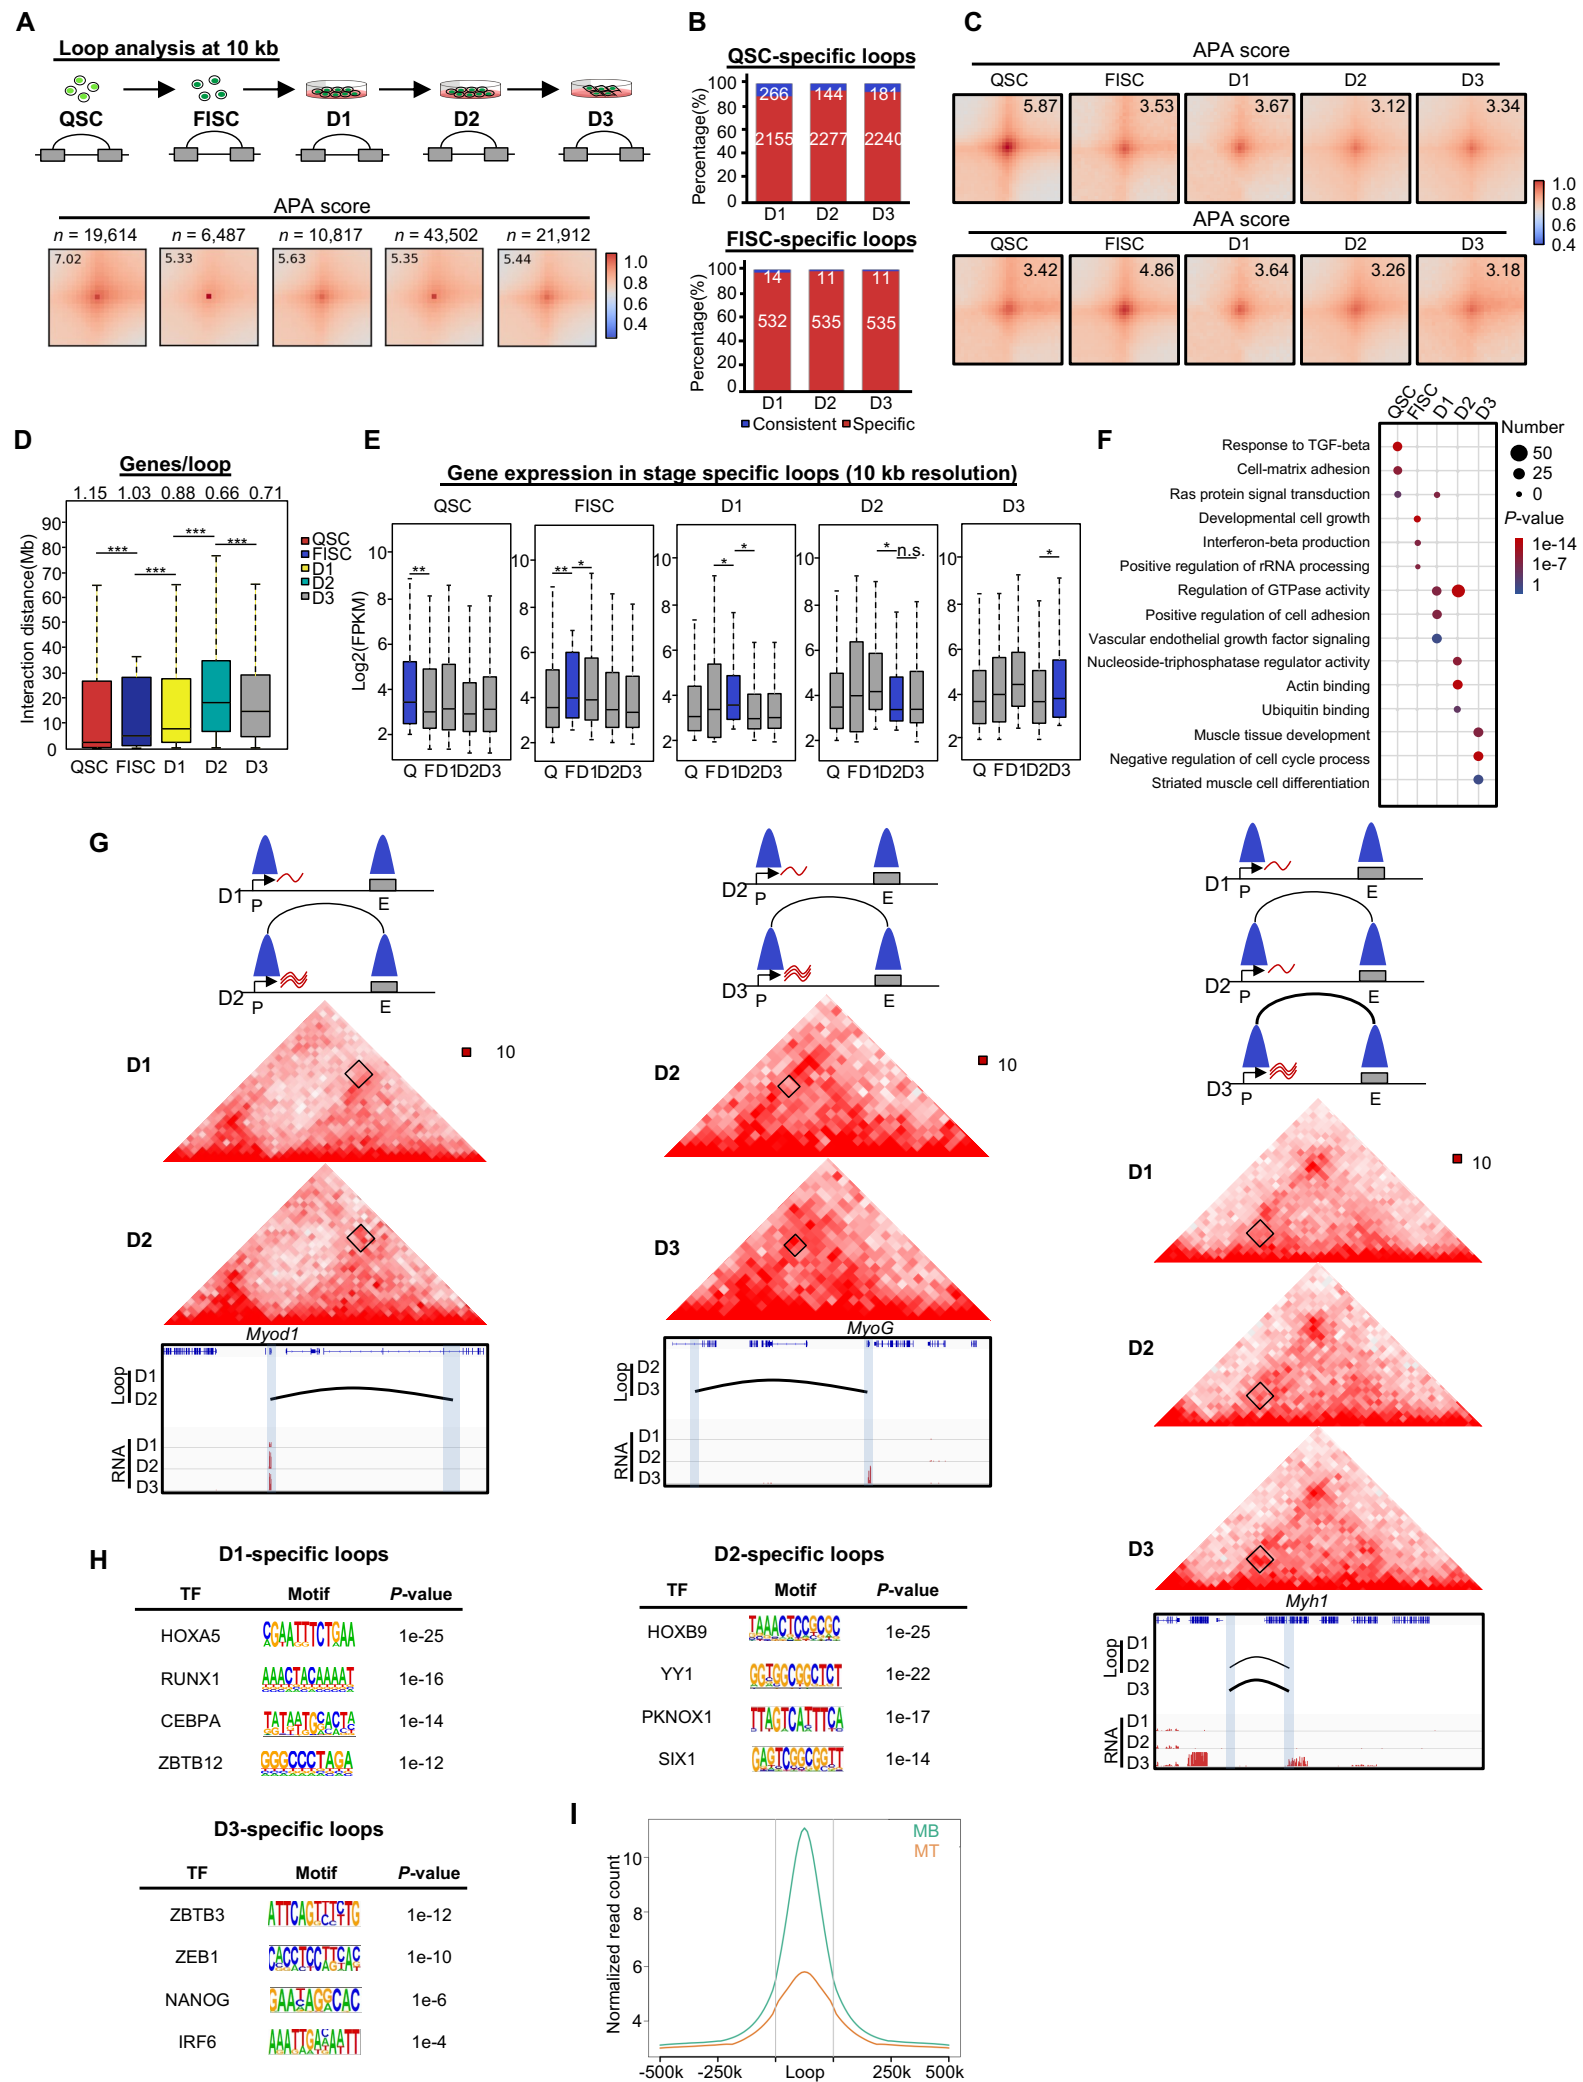

**Figure S7. Dynamics of chromatin loops during SC lineage progression.** (A) (top) Illustration of identified chromatin loops in QSC, FISC, D1, D2 and D3. Bin size, 10 kb. (Bottom) Aggregated peak analysis (APA) analysis of all chromatin loops detected at QSC ( $n = 19,614$ ), FISC ( $n = 6,487$ ), D1 ( $n = 10,817$ ), D2 ( $n = 43,502$ ) and D3 ( $n = 21,912$ ). Bin size, 10 kb. (B) Bar graph depicting the number and fraction of QSC-specific loops (top) and FISC-specific loops (bottom) that appeared at the late stages. (C) Aggregated peak analysis (APA) analysis of QSC-specific loops or FISC-specific loops at each time point. Bin size, 10 kb. (D) Boxplot depicting changes in loop size during SC lineage progression. Average number of genes per loop are show above. (E) Box plot depicting expression dynamics of genes within stage-specific loops. (F) Bubble plot of the enriched GO terms associated with genes in stage-specific loops. The bubble size represents the number of genes enriched in each term; the bubble color represents the enrichment significance. (G) Hi-C contact maps depicting stage-specific loops form around *Myod1*, *MyoG*, and *Myh1* genomic locus during SC lineage progression. Left, black square in Hi-C contact matrix and black arc denote a chromatin loop formed between *Myod1* locus and a downstream region at D2. RNA-seq tracks showing the induction of *Myod1* RNA expression at D2. Middle, black square in Hi-C contact matrix and black arc denote a chromatin loop formed between *MyoG* locus and an upstream region at D3. RNA-seq tracks showing the induction of *MyoG* RNA expression at D3. Right, black square in Hi-C contact matrix and black arc denote a chromatin loop formed between *Myh1* locus and an upstream region at D2 and strengthened at D3. RNA-seq tracks showing the induction of *Myh1* RNA expression at D3. (H) Motif enrichment was conducted in the stage-specific loop anchors by HOMER. (I) YY1 ChIP-seq profiles in myoblast (MB) or myotube (MT) were collected. Meta plot showing the enrichment of YY1 occupancy in the anchors of D2-specific loops (YY1 ChIP-seq in MB) and reduced enrichment of YY1 binding in D3-specific loop anchors (YY1 ChIP-seq in MT). Data in D and E are presented in boxplots.  $*P < 0.01$ ,  $**P < 0.001$ ,  $***P < 0.0001$ . n.s., no significance, Wilcoxon signed-rank test.

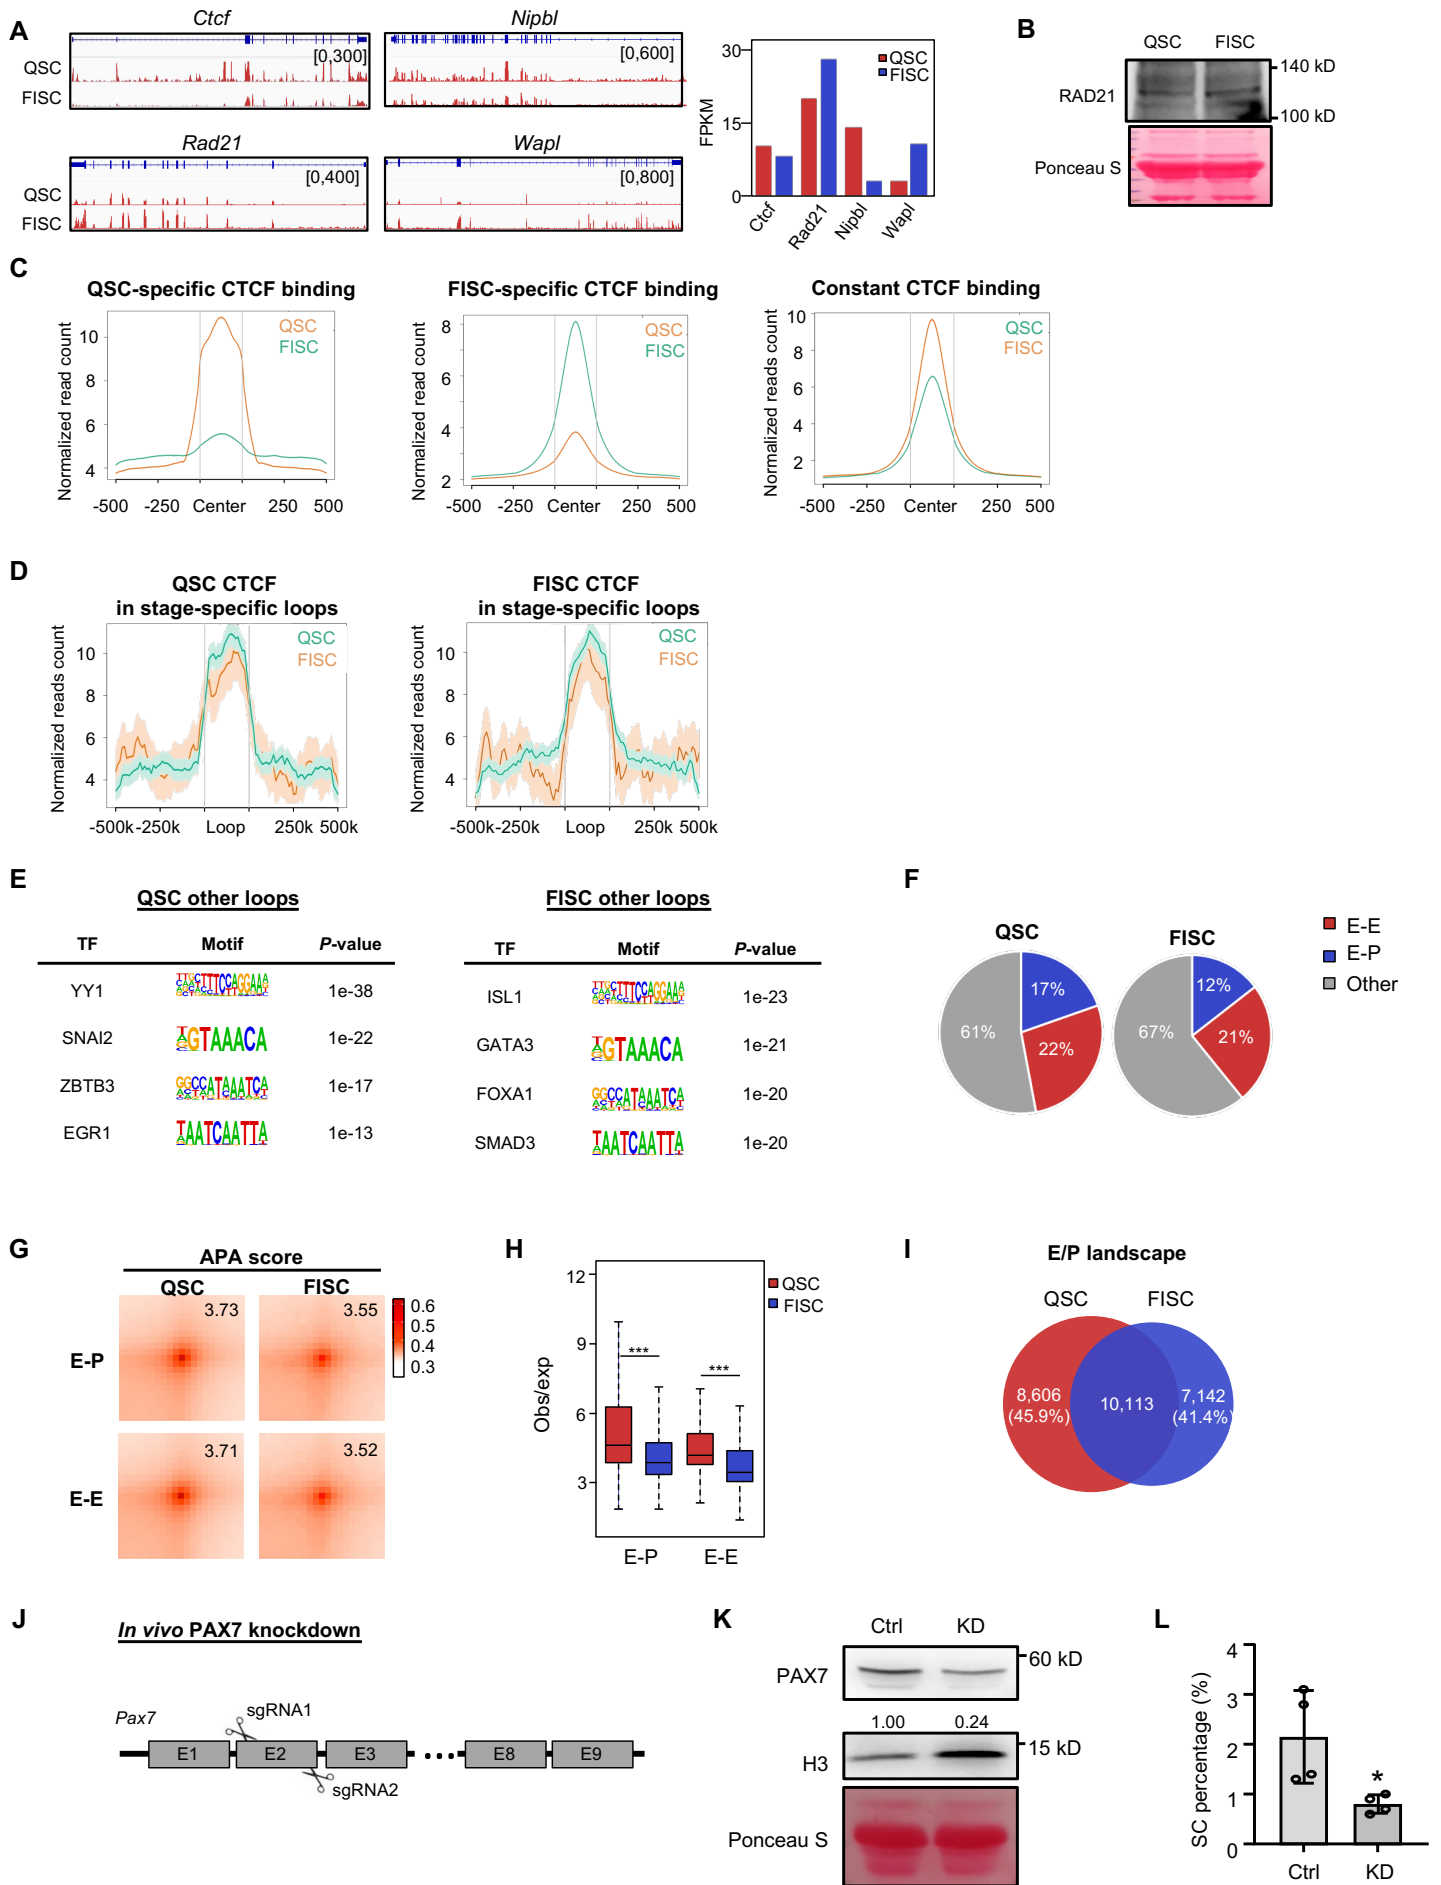



**Figure S8. PAX7 regulates E/P loop reorganization during SC early activation.** (A) Left: RNA-seq tracks showing *Ctcf*, *Rad21*, *Nipbl* and *Wapl* mRNA expression in QSC and FISC. Right: bar graphs showing the RNA expression levels (FPKM). (B) Western blot analysis of RAD21 protein in QSC and FISC. Ponceau S staining was used as loading control. (C) CTCF ChIP-seq binding peaks in QSC and FISC were analyzed. QSC-specific, FISC-specific and constant binding peaks were identified and Meta plot showing the CTCF binding signals in each category. (D) Enriched CTCF binding signals at the anchor regions of QSC- or FISC-specific loops. (E) Enriched TF motifs in the loop anchors of “other” loops in QSC and FISC conducted by HOMER. (F) Distribution of enhancer-enhancer (E-E), Enhancer-Promoter (E-P) and other types of loops among E/P loops in QSC and FISC. (G) APA analysis of E-E and E-P chromatin loops detected in QSC and FISC. (H) Box plot depicting interaction intensity (Obs/exp) of the above E-E and E-P loops. \*\*\* $P < 0.0001$ , Wilcoxon signed-rank test. (I) Overlapping of active enhancers and promoters between QSC and FISC. The number and the percentage of overlapped and specific enhancers and promoters are shown. (J) Schematic illustration showing the design of dual sgRNAs (sgRNA1, sgRNA2) targeting *Pax7* exon 2 for *in vivo* deletion of *Pax7* in SCs by the CRISPR/Cas9/AAV9-dual sgRNA system. (K) WB showing the decreased PAX7 protein in the above isolated SCs from KD compared to Ctrl mice. The PAX7 expression level was normalized to Histone 3. Ponceau S was used as a loading control. Immunoblots are representative of two independent experiments. (L) SCs were isolated from Ctrl or PAX7 KD mice. Box plot depicting mean percentage of sorted QSCs in the total number of events and presented as mean  $\pm$  s.d.  $n = 4$  mice per group. \* $P < 0.05$ , two-tailed unpaired Student's *t*-test.

**A** *In vivo* RE deletion

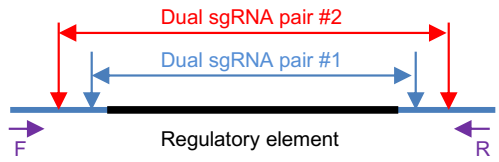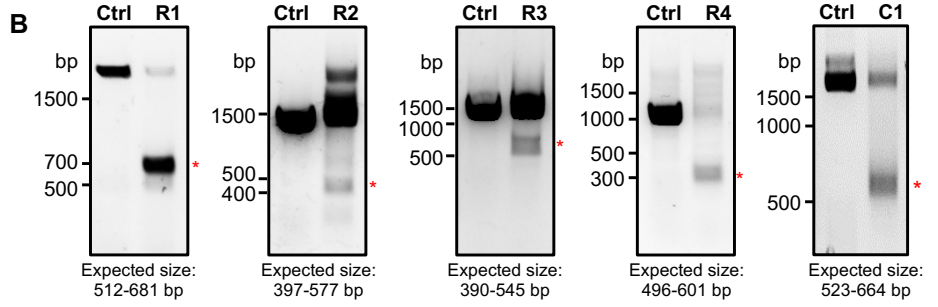

**C** QSC

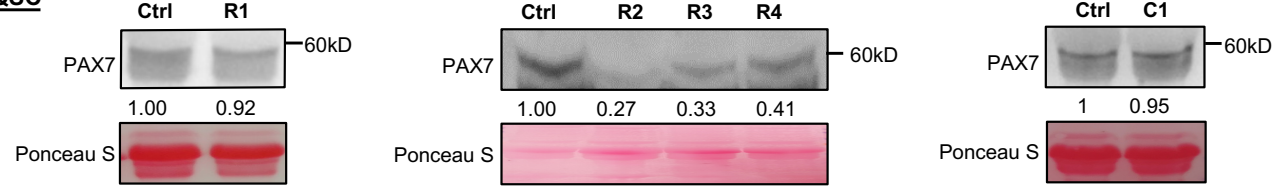

**D** FISC

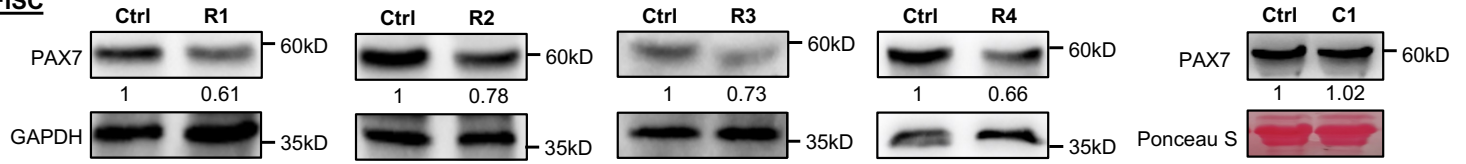

**E**

|      | Valid pairs |
|------|-------------|
| Ctrl | 223,714,781 |
| R1   | 274,067,815 |
| R2   | 236,133,079 |
| R3   | 287,791,890 |
| R4   | 238,788,306 |

**F**

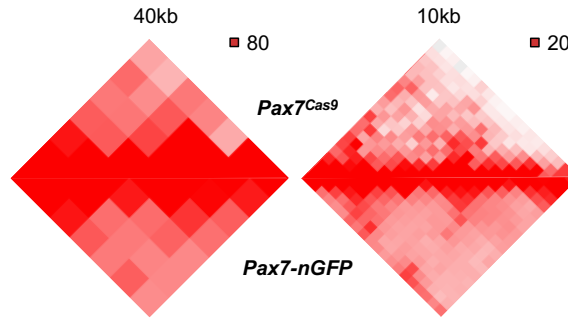

**G**

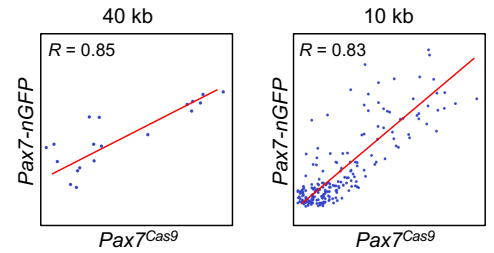

**H**

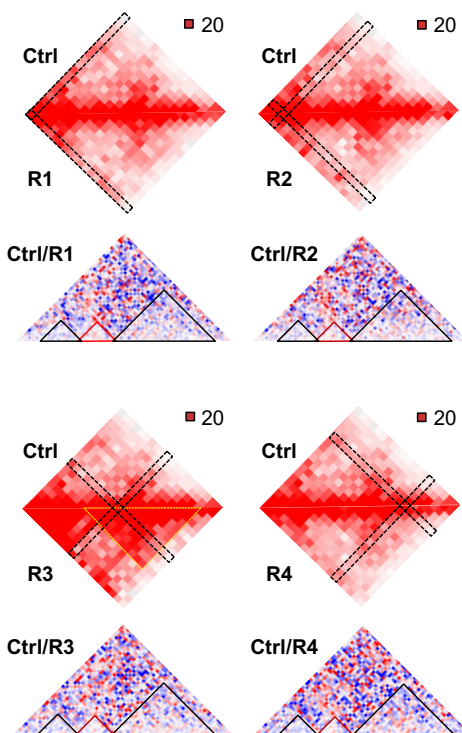

**I**

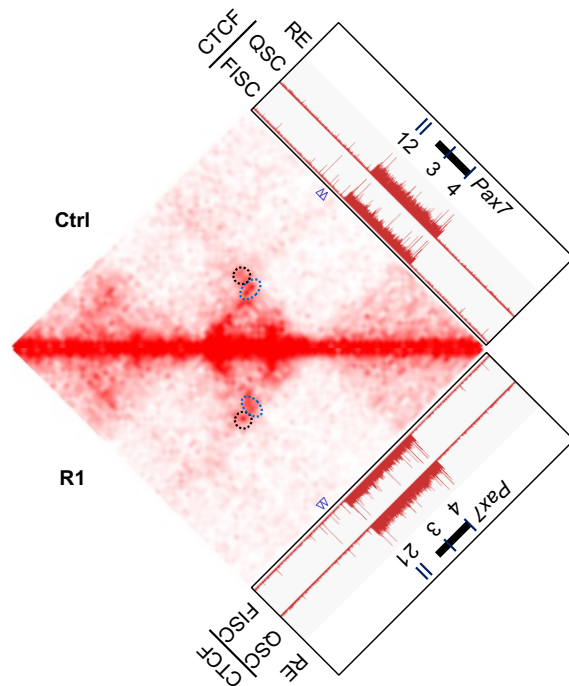

**Figure S9. 3D regulatory interactions orchestrate *Pax7* expression dynamics in SC. (A)** Schematic illustration showing the design of dual sgRNA pairs for *in vivo* deletion of individual regulatory element (RE) in SCs by the CRISPR/Cas9/AAV9-dual sgRNA system. The purple arrows (F and R) indicate PCR primers for genomic PCR analysis to assess *in vivo* deletion efficiency. **(B)** SCs were isolated from Ctrl or mutant mice and genomic PCR analysis was performed to test the cleavage efficiency. The deletion product (red asterisk) and expected size after deletion (below) are shown. **(C)** PAX7 protein level in the above QSCs was examined by Western blot. Ponceau S was used as loading control. Relative band intensity is shown. **(D)** PAX7 protein level in the above FISCs was examined by Western blot. GAPDH was used as loading control. Relative band intensity is shown. **(E)** *In situ* Hi-C was performed on QSCs isolated from Ctrl or mutant mice. The number of valid pairs generated from each sample are shown. **(F)** Comparison of contact frequencies at the TAD encompassing *Pax7* locus in QSCs from *Pax7-nGFP* or *Pax7<sup>Cas9</sup>* mice at 40 kb (left) or 10 kb (right) resolution. **(G)** Correlation of contact frequencies within the *Pax7* residing TAD between *Pax7-nGFP* and *Pax7<sup>Cas9</sup>* mice at 40 kb (Left) or 10 kb (Right) resolution. Pearson correlation coefficients (*R*) are indicated. **(H)** Comparison of contact frequencies of intra- (top) or inter- TAD (bottom) between Ctrl and RE deletion mutants. Top: The yellow triangle indicates a new sub-TAD identified in R3 QSCs. Each RE is highlighted with dotted box. Bottom: *Pax7* residing TAD is highlighted as dotted black triangle while two TADs surrounding the *Pax7* TAD are highlighted as black triangles. **(I)** Comparison of Hi-C contact maps between Ctrl and R1 QSCs. CTCF ChIP-seq in QSC and FISC are highlighted. Black circle, enhanced contact in R1 QSC; blue circle, diminished contact in R1 QSC; blue triangle, putative CTCF sites that may participate in the new loop formation in R1 QSC.

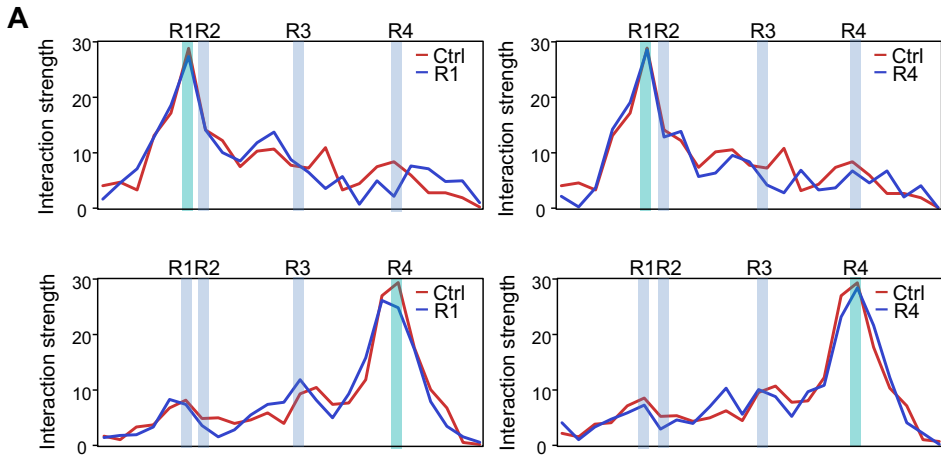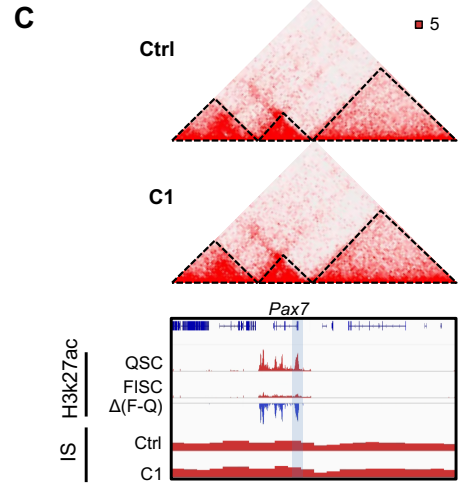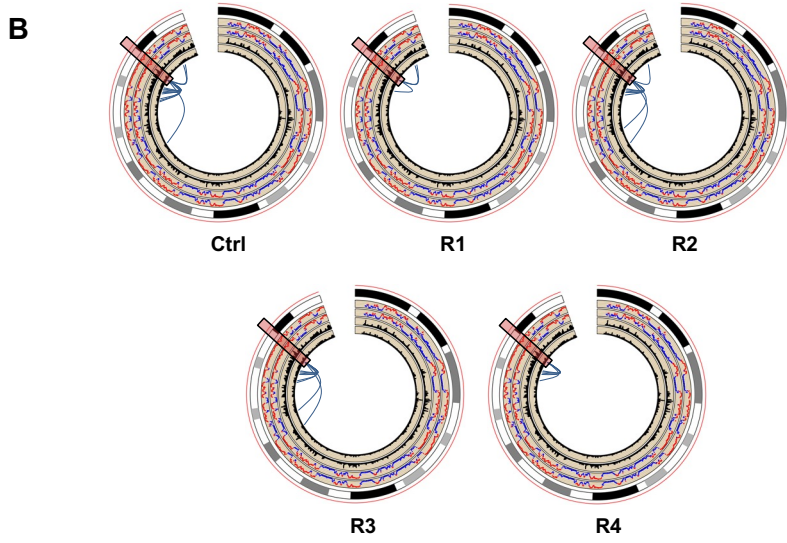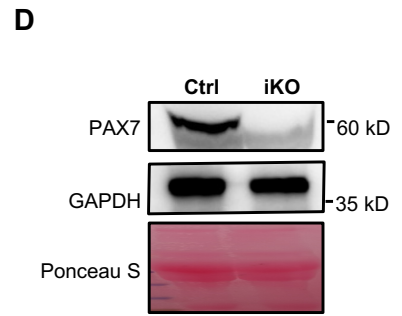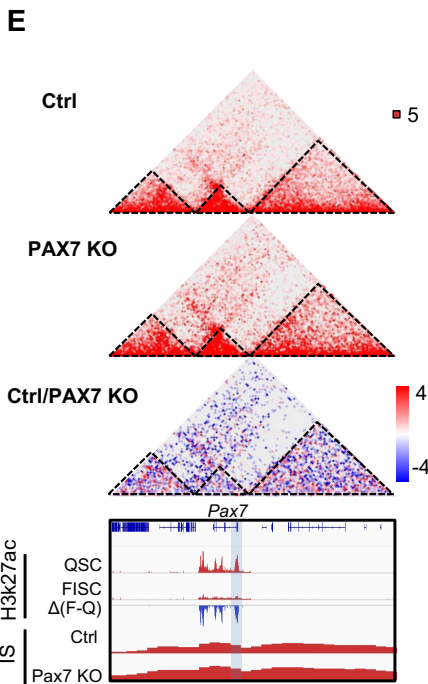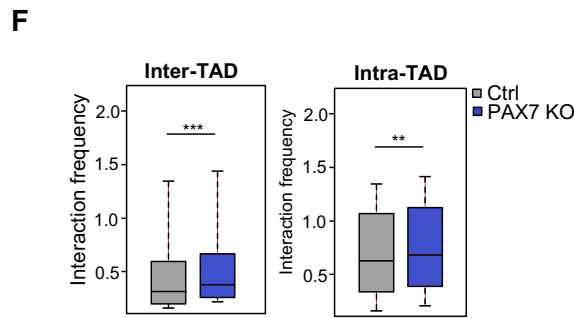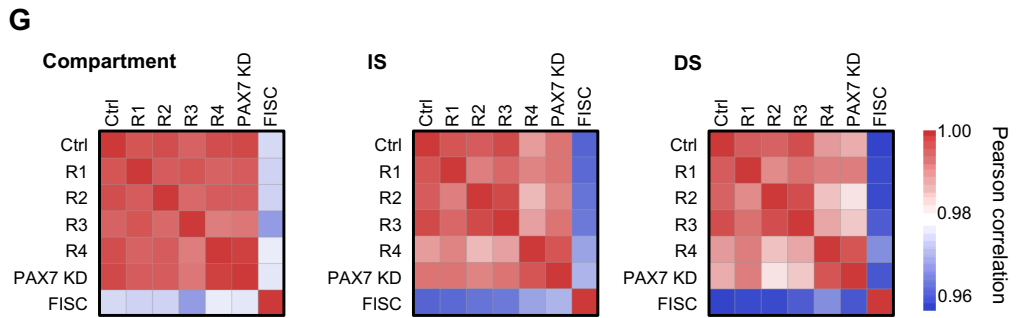

**Figure S10. 3D regulatory interactions orchestrate *Pax7* expression dynamics in SC. (A)** Virtual 4C analysis on *Pax7* locus in QSC from Ctrl or RE mutant mice. **(B)** Circos diagrams showing the intra-chromosome interaction between the loci in *Pax7* TAD (red box) and other loci in Ctrl and mutant QSCs. **(C)** Hi-C contact maps (10-kb resolution) showing *Pax7* TAD organization in C1 group in comparison with Ctrl group. **(D)** WB showing the deletion of PAX7 protein in FISCs collected from *Pax7* iKO vs. Ctrl mice. GAPDH and Ponceau S were used as loading controls. Immunoblots are representative of two independent experiments. **(E)** Hi-C contact maps (10-kb resolution) showing *Pax7* TAD reorganization in the *Pax7* iKO QSC in comparison with Ctrl. **(F)** Boxplots showing inter- (between the *Pax7* TAD and other *cis*-interacting TADs) or intra-TAD (within *Pax7* TAD) interactions.  $**P < 0.001$ ,  $***P < 0.0001$ , Wilcoxon signed-rank test. **(G)** Heatmap showing the Pearson correlation among Ctrl QSC, RE deletion QSC (R1, R2, R3, R4), *Pax7 in vivo* knockdown QSC and FISC, based on the PC1 values (100 kb bins), IS values (40 kb bins) and DS (40 kb bins).

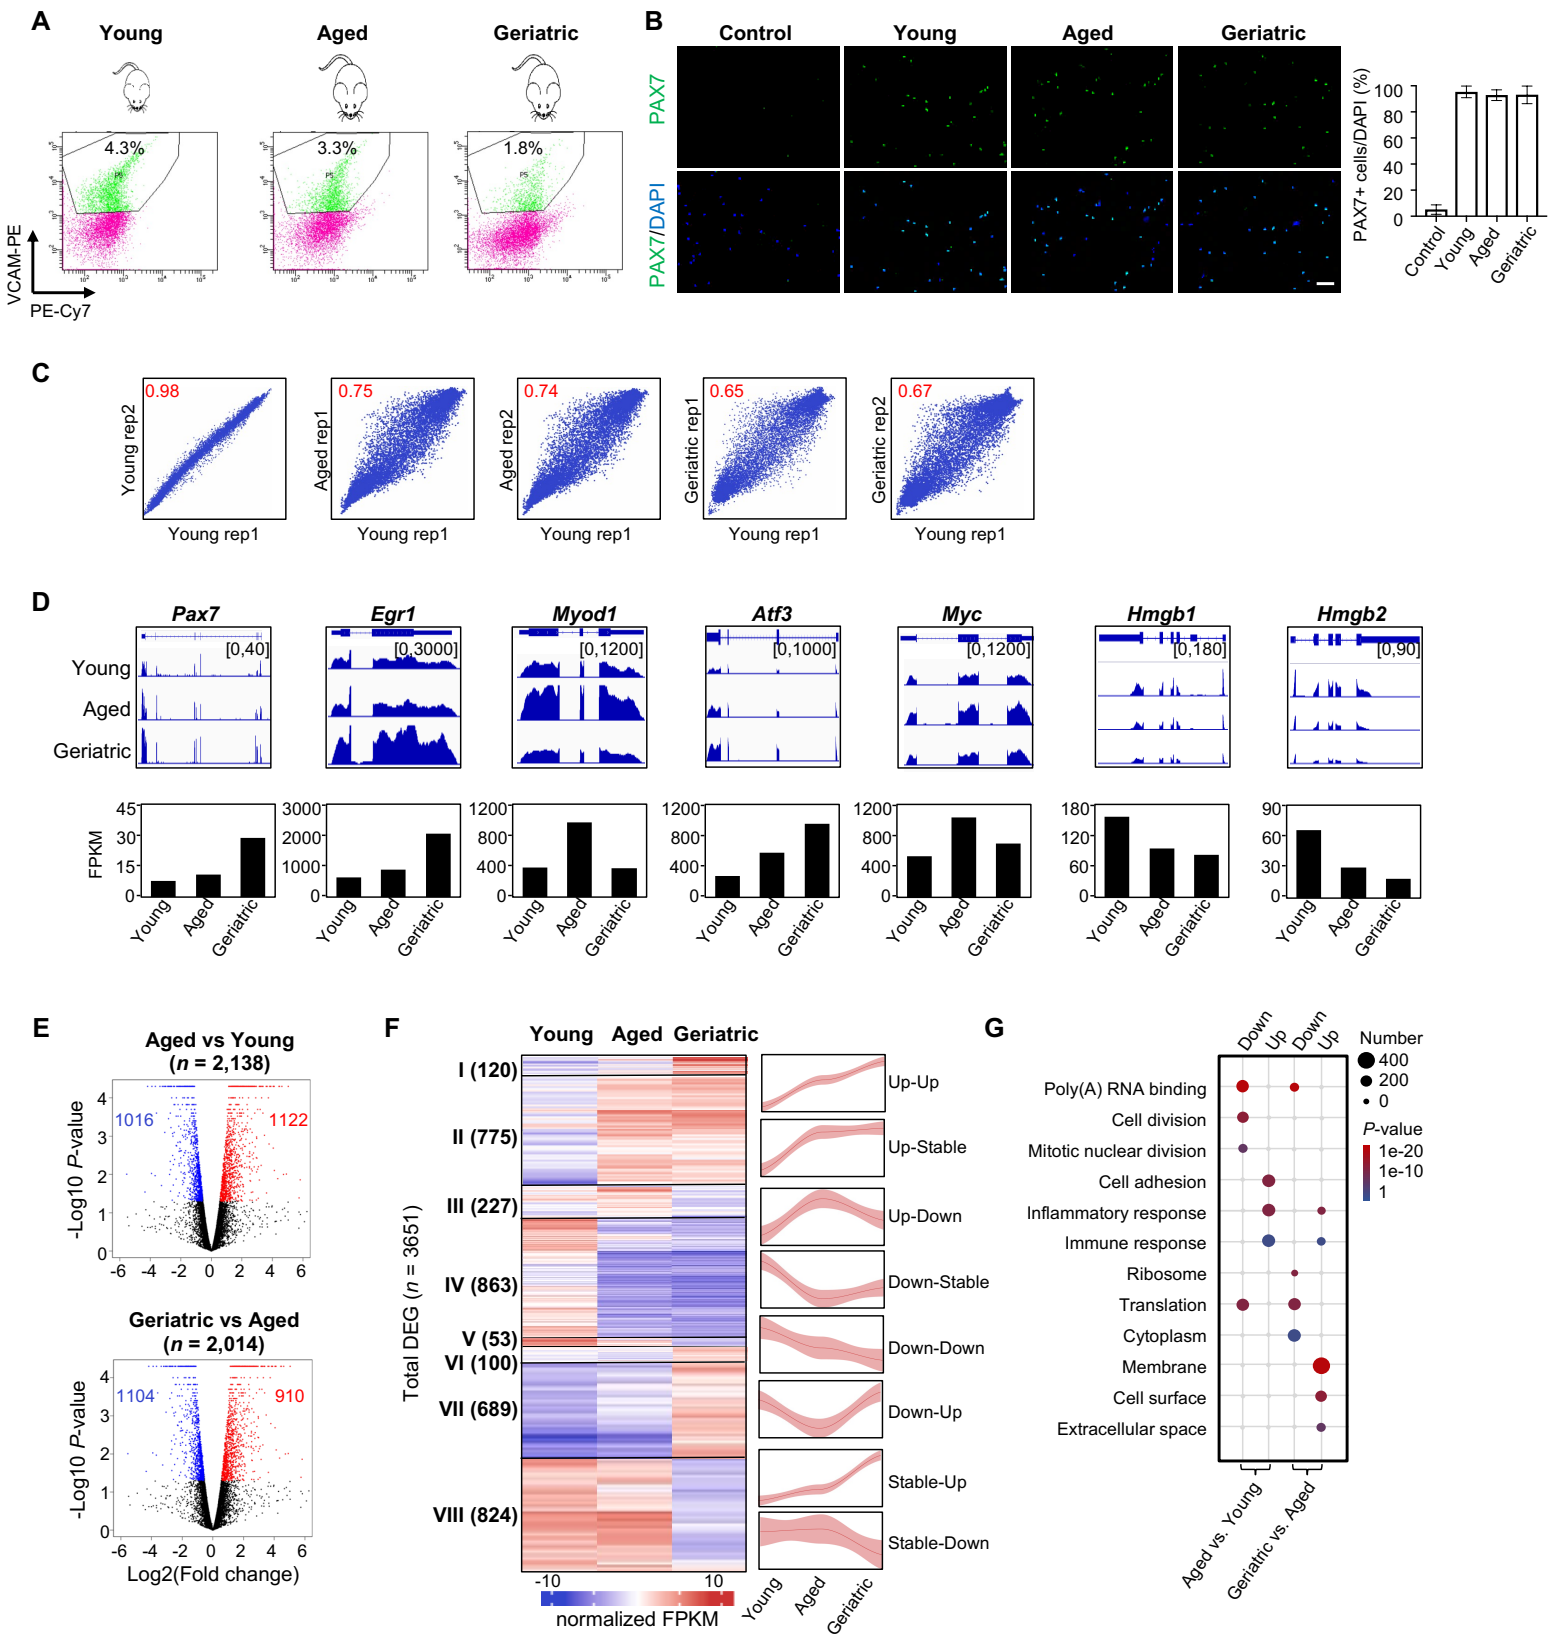

**Figure S11. Dynamics of transcriptome during mouse SC aging.** (A) VCAM+ FISCs were collected from young (2 months), aged (23-24 months) and geriatric (28-32 months) C57BL/6J mice. FACS profiles are shown and the gates indicate the population of FISCs isolated for following analysis. Values on the plots indicate mean percentage of sorted FISCs in the total number of events. (B) Left: PAX7 IF staining was performed on the above collected cells. Scale bar, 50  $\mu$ m. (right) the percentages of PAX7+ cells in FISCs are plotted. Control, young FISCs stained with secondary antibody only, depicting the background signal.  $n = 10$  fields. (C) Scatter plots showing RNA expression (FPKM) changes in aged or geriatric relative to young FISC expression. Pearson correlation coefficient ( $R$ ) is indicated in red. (D) (top) Genome browser view of *Pax7*, *Egr1*, *Myod1*, *Atf3*, *Myc*, *Hmgb1* and *Hmgb2* gene expression measured by RNA-seq; bottom: bar graph showing the RPKM values of the above genes. (E) Volcano plot of differentially expressed genes (DEGs) in Aged vs. Young (top) and Geriatric vs. Aged (bottom) FISCs. The blue and red dots lying in left and right represent significantly down- and up-regulated genes, respectively ( $P$ -value  $\leq 0.05$ , linear fold change  $\leq -2$  or  $\geq 2$ ). Number of down- and up-regulated genes is also indicated. (F)  $k$ -means clustering ( $k = 8$ ) of DEG profiles showing the kinetics for 8 clusters. Line graphs on the right depict kinetics of gene expression changes. Lines denote the mean values, while the shaded ribbons represent the 95% confidence interval (CI). (G) Bubble plot showing the enriched GO terms of genes associated with the indicated category. The bubble size represents the number of genes enriched in each term; the bubble color represents the enrichment significance.

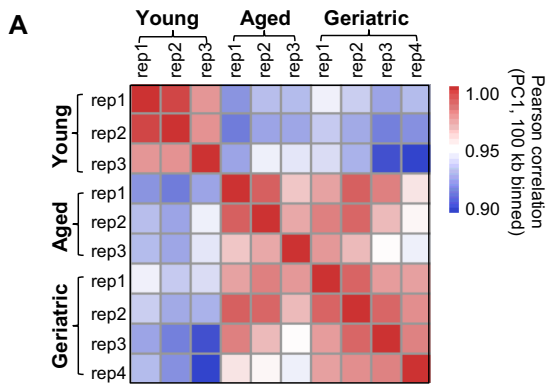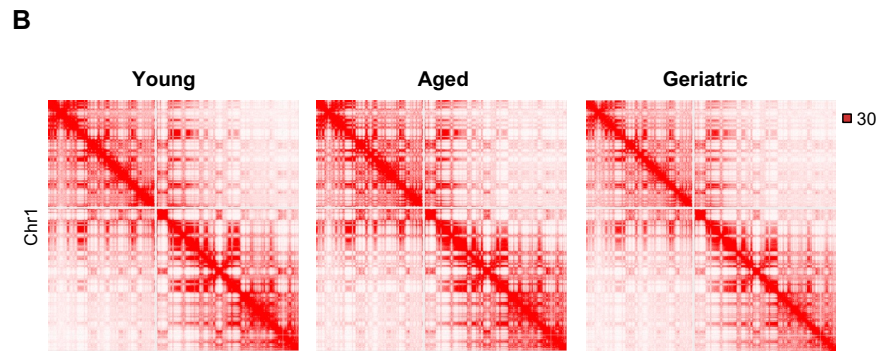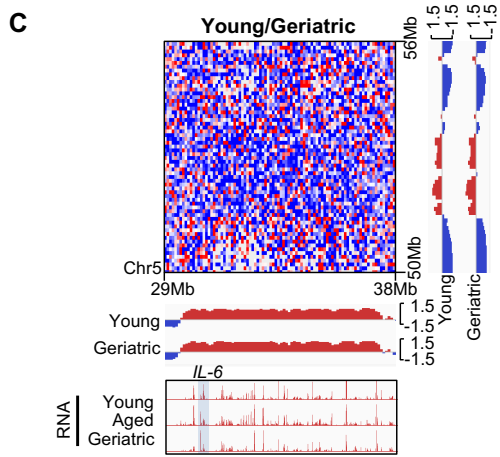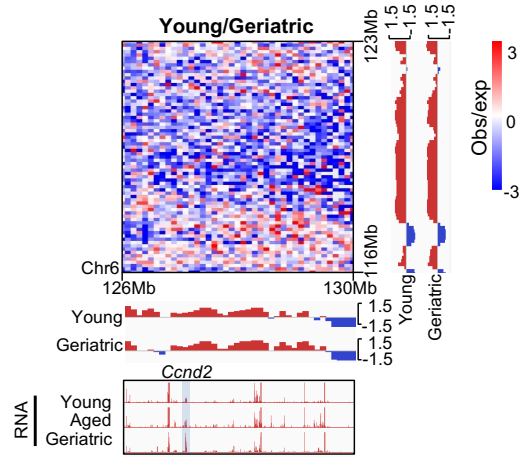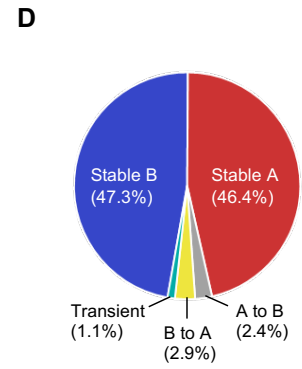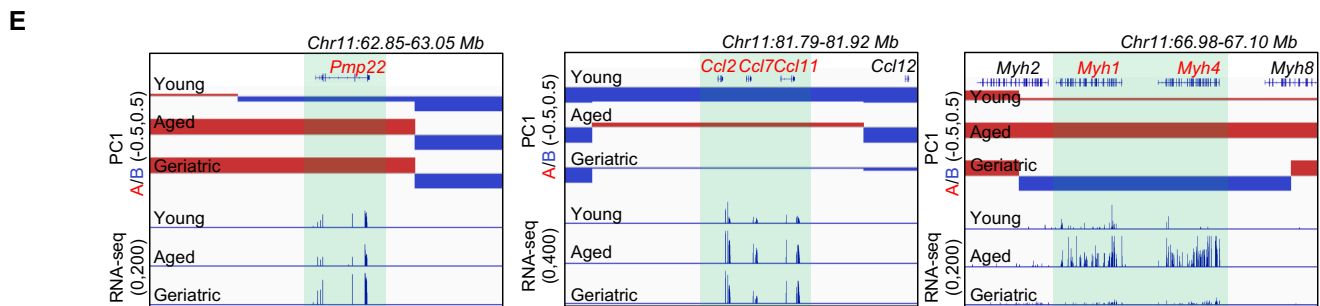



**Figure S12. Global reorganization of genome compartmentalization during mouse SC aging.** (A) Heatmap showing the Pearson correlation among replicates of Hi-C libraries, based on the PC1 values (100 kb bins). (B) Observed contact matrices for Chr1 at 500-kb resolution during SC aging. The scale is adjusted to account for the total coverage on Chr1 at each stage. (C) (left) Differential heatmap on chromosome 6 showing increased A-A interactions in Geriatric vs. Young FISC, accompanied with an increase in *Il-6* mRNA expression. (right) Differential heatmap on chromosome 15 showing increased A-A interactions in Geriatric vs. Young FISC, accompanied with increase in *Ccnd2* mRNA expression. PC1 signals at each stage are displayed on the bottom of the heatmap. (D) Pie chart depicting fraction of the genome with or without compartment switching during SC aging. (E) Genome-browser view of *Pmp22* (left), *Ccl2-Ccl7-Ccl11* (middle) and *Myh1-Myh4* (right) loci. PC1 and RNA-seq at each stage are shown. Green shade indicates compartment switching.

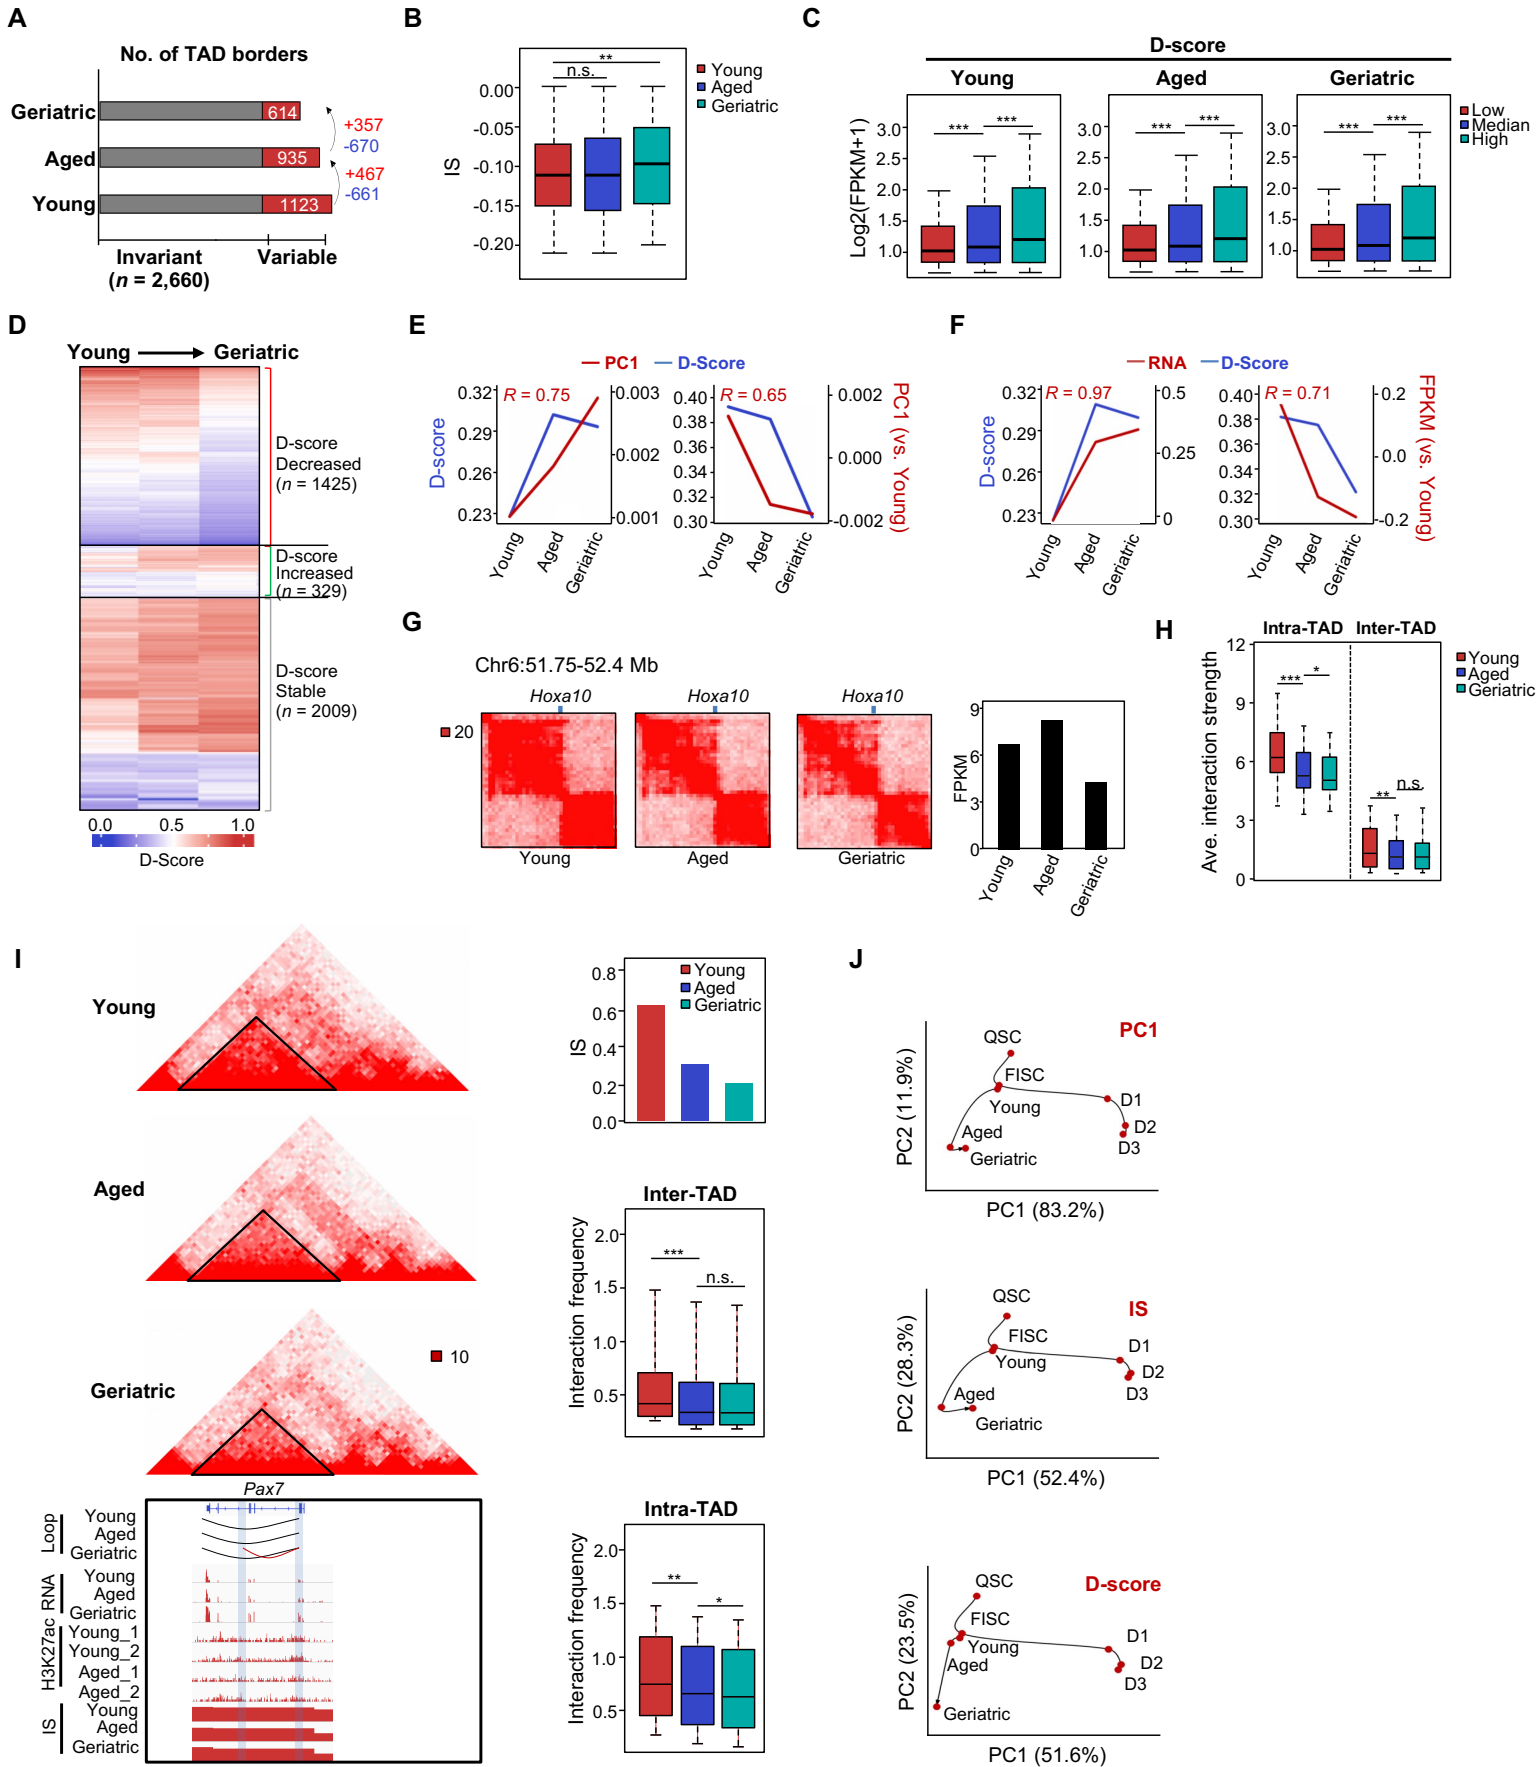

**Figure S13. Multiscale analysis of 3D genome during mouse SC aging.** (A) The number of TAD borders identified per time point. Invariant borders are present at all stages while variable borders are lost or acquired in between two adjacent stages. (B) Box plot depicting the IS of TAD borders at each stage. (C) Boxplots depicting expression of genes in TADs with a low (0, 0.3), average (0.3, 0.6) or high (0.6, 0.9) relative domain score (D-score). (D) Hierarchical clustering showing the kinetics for groups with increased ( $n = 329$ ), decreased ( $n = 1,425$ ), or stable ( $n = 2,009$ ) D-scores during SC aging. (E-F) Average D-score and PC1 kinetics (E) or gene expression (F) analysis for clusters of TADs that were gained or lost in Geriatric vs. Young. Pearson correlation coefficients ( $R$ ) are indicated. (G) (left) Illustration of *in situ* Hi-C contact maps (40-kb resolution) on the *Hoxa10* locus. Bar graph showing the FPKM kinetics of *Hoxa10* expression during SC aging. (H) Contact enrichment of intra- and inter-TADs during SC aging. Data are represented as boxplots based on the intra- and inter-TAD values per TAD. (I) Hi-C contact maps depicting *Pax7* TAD reorganization during SC aging. Genome-browser view of chromatin loops, *Pax7* RNA expression, H3K27ac signals in Young and Aged FISCs, and IS around *Pax7* locus during SC aging. Bar plot showing the IS values of the above borders. Boxplots showing inter- or intra-TAD interactions. (J) PCA analysis of PC1 values, IS, and D-score during SC lineage progression and SC aging. Black arrows denote the hypothetical trajectory. Data in B, C and I are presented in boxplots. \* $P < 0.01$ , \*\* $P < 0.001$ , \*\*\* $P < 0.0001$ , Wilcoxon signed-rank test.

**Fig. 3E**

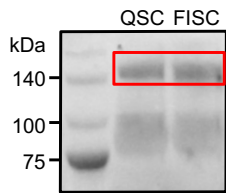

CTCF

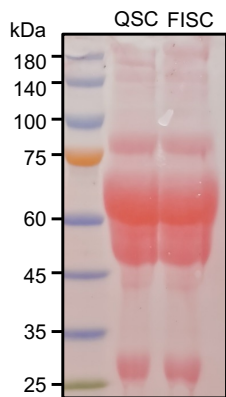

Ponceau S

**Fig. S8B**

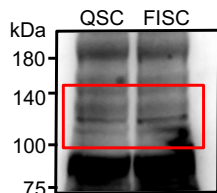

RAD21

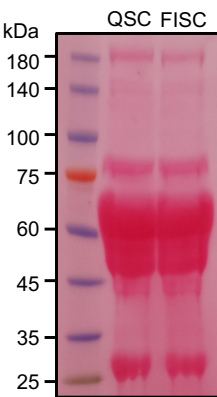

Ponceau S

**Fig. S8K**

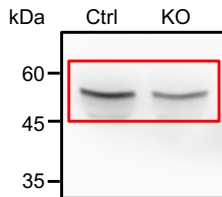

PAX7

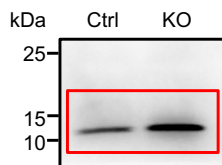

H3

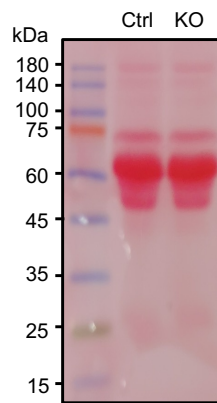

Ponceau S

**Fig. S9B**

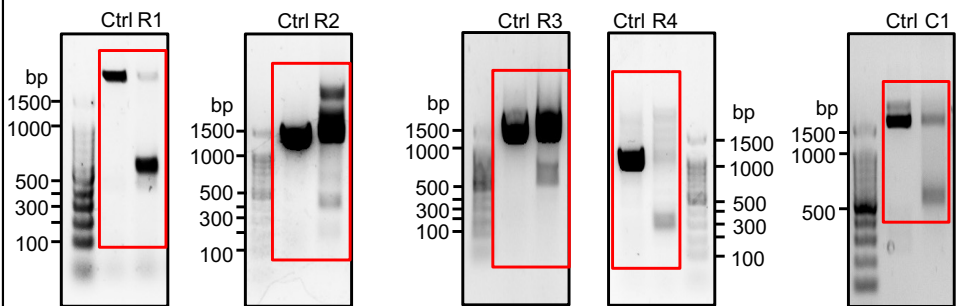

**Figure S14. Source data for gel images and immunoblots relating to Fig. 3E, S8B, S8K and S9B.**

**Fig. S9C**

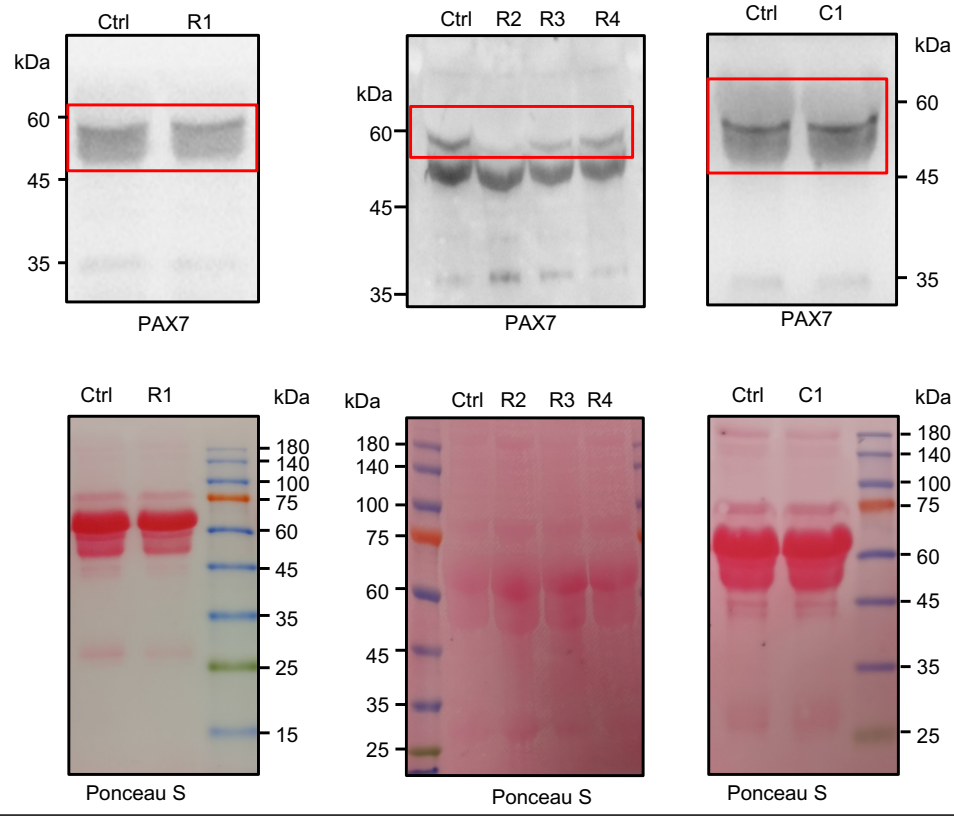

**Fig. S9D**

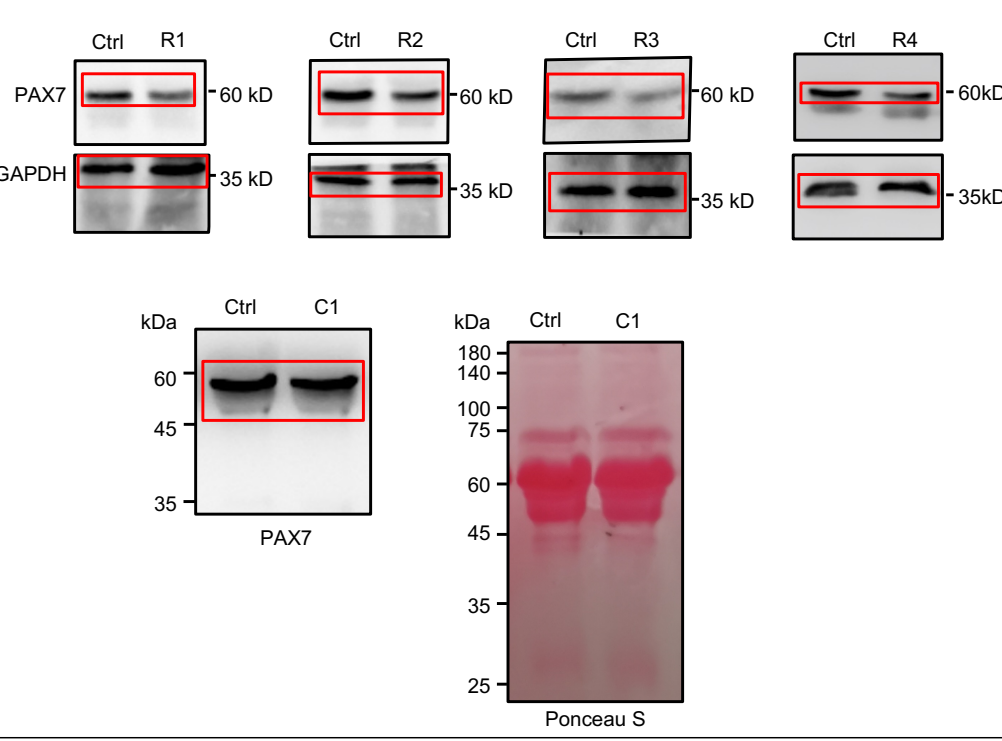

**Fig. S10C**

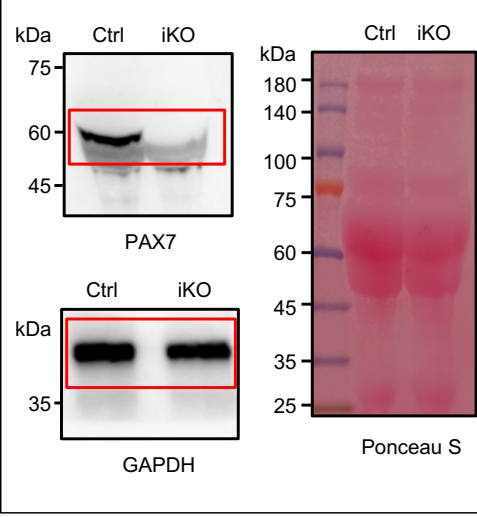

**Figure S15. Source data for immunoblots relating to Fig. S9C, S9D and S10C.**

**Table S1. (separate file)**

Basic statistics of *in-situ* Hi-C data.

**Table S2. (separate file)**

Compartment analysis during SC lineage progression.

**Table S3. (separate file)**

RNA-seq analysis during SC lineage progression.

**Table S4. (separate file)**

TAD analysis during SC lineage progression.

**Table S5. (separate file)**

TAD cluster analysis during SC lineage progression.

**Table S6. (separate file)**

Loop analysis from QSC to FISC.

**Table S7. (separate file)**

Pax7 KO analysis in QSC.

**Table S8. (separate file)**

RNA-seq analysis in aging SCs.

**Table S9. (separate file)**

Compartment analysis during SC aging.

**Table S10. (separate file)**

TAD and loop analysis during SC aging.

**Table S11. (separate file)**

Sequences of oligos used in the study.

**Table S12. (separate file)**

Summary of all public datasets used in the study.
